1 **A novel nematode species from the Siberian permafrost shares adaptive**  
2 **mechanisms for cryptobiotic survival with *C. elegans* dauer larva**

3 Anastasia Shatilovich<sup>1#</sup>, Vamshidhar R. Gade<sup>2,9#</sup>, Martin Pippel<sup>3</sup>, Tarja T. Hoffmeyer<sup>4</sup>, Alexei  
4 V. Tchesunov<sup>5</sup>, Lewis Stevens<sup>6</sup>, Sylke Winkler<sup>2,7</sup>, Graham M. Hughes<sup>8</sup>, Sofia Traikov<sup>2</sup>,  
5 Michael Hiller<sup>3,10</sup>, Elizaveta Rivkina<sup>1</sup>, Philipp H. Schiffer<sup>4\*</sup>, Eugene W Myers<sup>3</sup>, Teymuras  
6 V. Kurzchalia<sup>2\*</sup>

7

8 1. Institute of Physicochemical and Biological Problems in Soil Science RAS, Pushchino,  
9 Russia

10 2. Max Planck Institute for Molecular Cell Biology and Genetics, Dresden, Germany

11 3. Center for Systems Biology, Dresden, Germany

12 4. Institute for Zoology, University of Cologne

13 5. Department of Invertebrate Zoology, Faculty of Biology, M.V. Lomonosov Moscow State  
14 University, Moscow, Russia

15 6. Tree of Life, Wellcome Sanger Institute, Cambridge, UK

16 7. DRESDEN concept Genome Center, Dresden, Germany

17 8. School of Biology and Environmental Science, University College Dublin, Belfield, Dublin,  
18 Ireland

19 9. Institute of Biochemistry, ETH Zürich, 8093 Zürich, Switzerland

20 10. LOEWE Centre for Translational Biodiversity Genomics, Senckenberg Society for  
21 Nature Research & Goethe University, Frankfurt am Main, Germany

22

23 # A.S and V.G contributed equally to this work

24 \*To whom correspondence may be addressed

25 Email: [kurzchalia@mpi-cbg.de](mailto:kurzchalia@mpi-cbg.de)

26 [p.schiffer@uni-koeln.de](mailto:p.schiffer@uni-koeln.de)

27

28

29

30

31

32 **Abstract**

33 Some organisms in nature have developed the ability to enter a state of suspended metabolism  
34 called cryptobiosis<sup>1</sup> when environmental conditions are unfavorable. This state-transition  
35 requires execution of a combination of genetic and biochemical pathways<sup>1,2,3</sup> that enable the  
36 organism to survive for prolonged periods. Recently, nematode individuals have been  
37 reanimated from Siberian permafrost after remaining in cryptobiosis. Preliminary analysis  
38 indicates that these nematodes belong to the genera *Panagrolaimus* and *Plectus*<sup>4</sup>. Here, we  
39 present precise radiocarbon dating indicating that the *Panagrolaimus* individuals have  
40 remained in cryptobiosis since the late Pleistocene (~46,000 years). Phylogenetic inference  
41 based on our genome assembly and a detailed morphological analysis demonstrate that they  
42 belong to an undescribed species, which we named *Panagrolaimus n. sp.* Comparative genome  
43 analysis revealed that the molecular toolkit for cryptobiosis in *Panagrolaimus n. sp.* and in *C.*  
44 *elegans* is partly orthologous. We show that biochemical mechanisms employed by these two  
45 species to survive desiccation and freezing under laboratory conditions are similar. Our  
46 experimental evidence also reveals that *C. elegans* dauer larvae can remain viable for longer  
47 periods in suspended animation than previously reported. Altogether, our findings demonstrate  
48 that nematodes evolved mechanisms potentially allowing them to suspend life over geological  
49 time scales.

50

51

52

53

54

55

56

57

58

59

60

61

62

63

## 64 **Introduction**

65 Organisms from diverse taxonomic groups can survive extreme environmental conditions, such  
66 as the complete absence of water or oxygen, high temperature, freezing, or extreme salinity.  
67 The survival strategies of such organisms include a state known as suspended animation or  
68 cryptobiosis, in which they reduce metabolism to an undetectable level<sup>6</sup>. Spectacular examples  
69 of long-term cryptobiosis include a *Bacillus* spore that was preserved in the abdomen of bees  
70 buried in amber for 25 to 40 million years<sup>7</sup>, and a 1000 to 1500 years-old *Lotus* seed, found in  
71 an ancient lake, that was subsequently able to germinate<sup>8</sup>. Metazoans such as tardigrades,  
72 rotifers and nematodes are also known for remaining in cryptobiosis for prolonged periods<sup>9,10</sup>.  
73 The longest records of cryptobiosis in nematodes are reported for the Antarctic species *Plectus*  
74 *murrayi*<sup>11</sup> (25.5 years in moss frozen at -20°C), and *Tylenchus polyhypnus*<sup>12</sup> (39 years  
75 desiccated in an herbarium specimen).

76 Intensive research during the last decade has demonstrated that permafrosts  
77 (perennially frozen sediments) are unique ecosystems preserving life forms at sub-zero  
78 temperatures over thousands of years<sup>13,14,15,16</sup>. Permafrost remains are an exceptional source  
79 for discovering a wide variety of unicellular and multicellular living organisms surviving in  
80 cryptobiosis for prolonged periods<sup>6,17,18</sup>. The Siberian permafrost is a unique repository for  
81 preserving organisms in sub-zero temperatures for millions of years. Expeditions in the past  
82 decade have resulted in the revival of several organisms across various taxa from the Siberian  
83 permafrost<sup>5,36,37,38</sup>. The possibility to exploit permafrost as a source for reanimating  
84 multicellular animals was recognized as early as 1936. A viable Cladocera crustacean  
85 *Chydorus sphaericus*, preserved in the Transbaikalian permafrost for several thousand  
86 years<sup>39,40</sup>, was discovered by P.N. Kapterev, who worked at the scientific station Skovorodino  
87 as a GULAG prisoner. Unfortunately, this observation remained unnoticed for many decades.  
88 We recently reanimated soil nematodes that were preserved in Siberian permafrost for  
89 potentially thousands of years, and initial morphological observations provisionally described  
90 them as belonging to the genera *Panagrolaimus* and *Plectus*. Previous studies demonstrated  
91 several species of *Panagrolaimus* can undergo cryptobiosis in the form of anhydrobiosis  
92 (through desiccation) and cryobiosis (through freezing)<sup>19,20,21,22,23</sup>. In various nematodes, entry  
93 into anhydrobiosis is often accompanied by a preparatory phase of exposure to mild  
94 desiccation, known as preconditioning<sup>21,24</sup>. This induces a specific re-modelling of the  
95 transcriptome, the proteome, and metabolic pathways that enhances survival ability<sup>2,3,25</sup>. Some  
96 panagrolaimids possess adaptive mechanisms for rapid desiccation where most of the cellular

97 water is lost, while others possess freezing tolerance without loss of water at sub-zero  
98 temperatures by inhibiting the growth and recrystallisation of ice crystals<sup>21</sup>.

99 Here we present a high-quality genome assembly, detailed morphological phylogenetic  
100 analysis, and define a novel species, *Panagrolaimus n. sp.* Precise radiocarbon dating indicates  
101 that *Panagrolaimus n. sp.* remained in cryptobiosis for about 46,000 years, since the late  
102 Pleistocene. Furthermore, making use of the model organism *C. elegans*, we demonstrate that  
103 *C. elegans* dauer larvae and *Panagrolaimus* utilize comparable molecular mechanisms to  
104 survive extreme desiccation and freezing, i.e. upregulation of trehalose biosynthesis and  
105 gluconeogenesis.

106

## 107 **Results**

### 108 **Discovery site and radiocarbon dating**

109 Previously, we had shown that nematodes from the Siberian permafrost with morphologies  
110 consistent with the genera *Panagrolaimus* and *Plectus* could be reanimated thousands of years  
111 after they had been frozen. Several viable nematode individuals were found in two of the more  
112 than 300 studied samples of permafrost deposits spanning different ages and genesis. Samples  
113 were collected by researchers of the Soil Cryology Lab, Pushchino, Russia, during perennial  
114 paleo-ecological expeditions carried out in the coastal sector of the northeastern Arctic<sup>17</sup>. The  
115 detailed description of the study site (outcrop Duvanny Yar, Kolyma River, Fig.1A), sampling  
116 and revitalizing procedures are provided in Supplementary Information (SI). Like other late  
117 Pleistocene permafrost formations in the northeastern Arctic, Duvanny Yar is composed of  
118 permanently frozen ice-rich silt deposits riddled with large polygonal ice wedges that divide  
119 them into mineral blocks<sup>26,27</sup> (Fig.1B). Sediments include sandy alluvial layers, peat lenses,  
120 buried paleosols and Pleistocene rodent burrows (Fig.1C). The burrow (P-1320), in which  
121 *Panagrolaimus* nematodes were found (Fig.1D), has been taken from the frozen outcrop wall  
122 at a depth of about 40 m below the surface and about 11 m above river water level in  
123 undisturbed and never thawed late Pleistocene permafrost deposits. The fossil burrow left by  
124 arctic gophers of the genus *Citellus* consists of an entrance tunnel and large nesting chamber  
125 up to 25 cm in diameter<sup>26</sup>.

126 The sterility of permafrost sampling and age of cultivated biota have been discussed in  
127 detail in several reviews<sup>14,28, 29</sup>. Based on previous reports, the age of the organisms found in a  
128 burrow is equal to the freezing time and corresponds to the age of organic matter conserved in  
129 the syncryogenic sediments. This makes it possible to use radiocarbon dating of organic matter

130 to establish the age of organisms. We performed Accelerator Mass Spectrometry (AMS)  
131 radiocarbon analysis of plant material obtained from studied borrow P-1320 and determined a  
132 direct  $^{14}\text{C}$  age of  $44,315 \pm 405$  BP (Institute of Geography, RAS; sample IGAN<sub>AMS</sub> 9137).  
133 Calibrated age range is 45,839 – 47,769 cal BP (95.4% probability) (Fig.S1).

134

135 **Like other parthenogenetic *Panagrolaimus*, the newly discovered species is triploid**

136 The revived animal was cultivated in the laboratory for over 100 generations and initially  
137 described as *Panagrolaimus* aff. *detritophagus*<sup>4</sup> based on morphology. We conducted a  
138 detailed morphological analysis of the revived animal (Fig.2, S2, Table S1; BOX1), which  
139 confirmed unambiguously that the animal belongs to the genus of *Panagrolaimus*, in  
140 agreement with a previous phylogenetic analysis of the 18S ribosomal RNA sequence<sup>4</sup>.  
141 However, due to the morphological uniformity of *Panagrolaimus*, unusual even for nematodes,  
142 morphology and molecular analysis of a single ribosomal RNA sequence is insufficient to  
143 describe a species. We found the species to be parthenogenetic, which further complicates  
144 description under most species concept. Due to these limitations, we decided to refer to the  
145 phylogenetic species concept, using phylogenetic trees based on multiple genes as markers.

146 To obtain comprehensive molecular data for phylogenomic species determination, we  
147 generated a genome assembly using PacBio HiFi sequencing with long reads (84X  
148 coverage, mean length 14,425 bp). Our analysis of repeat and gene content is described in  
149 Supplementary Table 3. K-mer analysis of the reads clearly indicated that this animal has a  
150 triploid genome (Fig.3A), like other parthenogenetic *Panagrolaimus* species<sup>30</sup>. Despite the  
151 challenges that a triploid genome poses for assembly, we obtained a highly contiguous contig  
152 assembly of the three pseudohaplotypes that comprise almost 266 Mb and thus have a similar  
153 genome size as other parthenogenetic *Panagrolaimus* species<sup>30</sup>. The contig N50 value of all  
154 three pseudohaplotypes is 3.8 Mb. Since these pseudohaplotypes exhibited a noticeable degree  
155 of divergence, we further investigated their relationship by using the apparent homeologs in  
156 our gene predictions to align the longest continuous contigs based on micro synteny (Fig. 3B).  
157 Links between the contigs clearly show the triploid state of the genome.

158

159

160

161

162

163 **BOX 1 Description of *Panagrolaimus n. sp. sp. nov.***

**Description** Body spindle-shaped and usually almost straight after fixation (Fig.2a, b). Cuticle thin and faintly annulated, 10–11 annules per 10  $\mu\text{m}$  in cervical region, 13–14 in midbody, preanally again 10 annules within 10  $\mu\text{m}$ . Conspicuous convex lateral fields with three incisures 1.5–2  $\mu\text{m}$  wide extended along the body from about  $\frac{1}{4}$ – $\frac{1}{3}$  procorpus length to  $\frac{2}{3}$  of tail length. In SEM, the lateral field looks like a bolster with a narrow median split. Labial region set off. Mouth opening surrounded with six lips (Fig.2c, d). Anterior sensilla as papillae arranged in two close but separate subsequent circles. Somatic sensilla (i.e., deirids and phasmids) not evident. Buccal cavity cylindro-conoid, and unarmed; its total length 9–13  $\mu\text{m}$ , maximum stoma width 1.7–2.8  $\mu\text{m}$  (Fig.2e). Dorsal stoma wall (dorsal rhabdion) more clearly sclerotized. Anterior part of the buccal cavity comprising cheilostom and gymnostom nearly cylindroids while stegostom conically narrowed and ended with a distinct tight flexion. Pharynx consists of three distinct parts: straight anterior procorpus, narrow medial isthmus and rounded terminal bulb. Procorpus gradually widening to its posterior end, always straight in all specimens, with transversal muscular striation, more prominent in posterior three fourths. Isthmus narrow, cylindroid, bent starkly in nearly all studied specimens. Terminal bulb strongly muscular, with a valvular apparatus at about 40% of the bulb length. Cardia in shape of truncate cone. Intestine (midgut) tissue filled with vacuoles and granules; in the anteriormost region, the granules smaller and look more pallid. Cell borders not visible in the intestine, but internal lumen distinct, sinusoid. No internal content visible in the internal lumen.

Ventral excretory-secretory pore and its cuticularized duct situated at the level of anterior part of the bulb. No other details of the excretory-secretory system visible. Vulval lips protruding. Genital branch monodelphic prodelphic and situated dorsally and to the right of the midgut (Fig.2f). Vagina distinctly cuticularized and opens to the elongate uterus. A long oviduct extended anteriorly from the anterior uterus; the oviduct folded up and then posteriorward and transforms into an elongate ovary. There are

|                      |                                                                                                                                                                                                                                                                                                               |
|----------------------|---------------------------------------------------------------------------------------------------------------------------------------------------------------------------------------------------------------------------------------------------------------------------------------------------------------|
|                      | one or two ripe eggs in the uterus in most specimens. Tail short conical, with short acute spike-like mucro (Fig.2g).                                                                                                                                                                                         |
| <b>Etymology</b>     | Species name <i>kolymaensis</i> (Latin) is derived from the Kolyma River area.                                                                                                                                                                                                                                |
| <b>Holotype</b>      | Senckenberg Natural History Museum, Frankfurt am Main, Germany (collection number SMF 17067).                                                                                                                                                                                                                 |
| <b>Paratypes</b>     | Senckenberg Natural History Museum, Frankfurt am Main, Germany (collection numbers SMF 17068, SMF 17069) (eighteen paratypes).                                                                                                                                                                                |
| <b>Type locality</b> | Frozen fossil rodent burrow buried in permafrost 45,839 – 47,769 cal BP, 40 meters from the surface, outcrop Duvanny yar, Kolyma River, North-East of Siberia, Russia (68.633410, 159.078800). Frozen material from burrow was collected by Dr.S.Gubin (Soil Cryology Lab, Pushchino, Russia) in august 2002. |

164

165 **Applying a phylogenomic concept to define *Panagrolaimus n. sp. nov.***

166 To place the species in the genus *Panagrolaimus*, we conducted a broader multi-gene  
167 phylogenomic analysis using Maximum likelihood methods. Our analysis of a concatenated,  
168 partitioned alignment of 60 genes, and a coalescence-based approach using a broader set of  
169 12,295 gene trees, retrieves the revived animal as sister to all other sequenced *Panagrolaimus*  
170 species, but as an ingroup to *Propanagrolaimus*<sup>31</sup> (Fig.3C; Fig. S3B-C). Thus, the phylogenetic  
171 placement provides strong evidence that this animal represents a novel species. Furthermore,  
172 there is substantial sequence divergence between this novel species, and *Panagrolaimus* sp.  
173 PS1159 and *Panagrolaimus* sp. ES5, estimated to be on average 2.06 and 2.11 amino acid  
174 substitutions per site in our concatenated alignment, respectively. The substantial divergence  
175 is in line with previous data on ages of *Panagrolaimus* nematodes<sup>30</sup>, and more broadly seen in  
176 nematodes, which can be hyper-diverse<sup>32,33</sup>. Our data also contradicts the assumption that  
177 parthenogenesis is a monophyletic trait<sup>30</sup> in the *Panagrolaimus* genus (Fig.3C). Using the gene-  
178 tree reconciliation approach implemented in GRAMPA (Gene-tree Reconciliation Algorithm  
179 with MUL (Multi labelled)-trees for Polyploid Analysis), we explored whether the additional  
180 set of proteins we found in the parthenogenetic species is a result of auto- or allopolyploidy.  
181 Finding these the additional proteins basally branching, outside of the lineage containing both

182 parthenogenetic and sexual species, suggests that an allopolyploid origin of these extra gene  
183 copies (Fig.S6). Based on the Kolyma River location where the animal was unearthed, we  
184 propose the following taxonomic classification and species name:

185 Phylum Nematoda Potts, 1932

186 Class Chromadorea Inglis 1983

187 Suborder Tylenchina Thorne, 1949

188 Family Panagrolaimidae Thorne, 1937

189 *Panagrolaimus* sp. nov.

190

191 ***C. elegans* dauer larvae and *Panagrolaimus n. sp.* might utilize partially similar**  
192 **mechanisms to enter and remain in cryptobiotic state for prolonged periods of time**

193 In the absence of established genetic methods in *Panagrolaimus n. sp.*, we referred to  
194 the model *C. elegans* as a comparator system to gain insights into possible pathways for long  
195 term survival<sup>3,4,24,25</sup>. The high-quality genome of *Panagrolaimus n. sp.* allowed us to compare  
196 its molecular toolkit for cryptobiosis with that of *C. elegans*. We used orthology clustering and  
197 phylogenetics to investigate whether the genome of *Panagrolaimus n. sp.* contains genes  
198 previously implicated in cryptobiosis in the *C. elegans* dauer larva. Our analysis showed that,  
199 like other *Panagrolaimus* species<sup>34,35</sup>, *Panagrolaimus n. sp.* also encodes orthologs to a *C.*  
200 *elegans* trehalose phosphate synthase gene (*tps-2*) and to a trehalose phosphatase gene (*gob-1*)  
201 (Fig. 3D, supplementary file Orthology analysis). Furthermore, we found orthologs to all *C.*  
202 *elegans* enzymes required for polyamine biosynthesis, the TCA cycle, glycolysis,  
203 gluconeogenesis, and glyoxylate shunt (Fig.3D, supplementary file Orthology analysis)  
204 suggesting that *Panagrolaimus n. sp.* might partially utilize similar molecular mechanisms as  
205 *C. elegans* to facilitate survival of unfavorable conditions.

206 Our earlier findings established that amongst several developmental stages of *C.*  
207 *elegans*, only the dauer larva, formed during unfavorable conditions (such as low nutrients and  
208 high population density), could survive anhydrobiosis and exposure to freezing<sup>4,24</sup>. The dauer  
209 larvae is in a hypometabolic state with distinct metabolic properties such as reduced oxygen  
210 consumption and heat dissipation in comparison to other larval stages of *C. elegans*. To survive  
211 extreme desiccation, *C. elegans* dauer larvae (in its hypometabolic state) need to be first  
212 preconditioned at high relative humidity (98% RH) for 4 days<sup>24</sup>. During preconditioning, dauer  
213 larvae upregulate trehalose biosynthesis that ensures their survival to harsh desiccation<sup>24,25</sup>. We  
214 tested whether survival of *Panagrolaimus n. sp.* is also facilitated by preconditioning. As there



215 is no dauer stage in the *Panagrolaimus* life cycle, we performed our experiments with a  
216 population of all the larval stages and adults. Although a small proportion of *Panagrolaimus*  
217 *n. sp.* individuals survive harsh desiccation and freezing without preconditioning (Fig.4A), the  
218 mixture of all the larval stages and adults of *Panagrolaimus n. sp.* survive significantly higher  
219 (p value< 0.0001) in proportion to harsh desiccation upon preconditioning (Fig.4A). Similarly,  
220 preconditioning and desiccation further enhanced survival rate of *Panagrolaimus n. sp.* to  
221 freezing (-80°C) (Fig.4A). Like *C. elegans* dauer larva, *Panagrolaimus n. sp.* upregulates  
222 trehalose levels up to 20-fold upon preconditioning (Fig.4B). We previously reported that, to  
223 upregulate trehalose levels upon preconditioning, *C. elegans* dauer larva dissipate their fat  
224 reserves (Triacylglycerols) by activating the glyoxylate shunt and gluconeogenic pathway<sup>25</sup>.  
225 Upon preconditioning, we found that triacylglyceride (TAG) levels are significantly decreased  
226 in *Panagrolaimus n. sp.* (Fig.S5A&B). To further investigate whether acetyl-CoA derived from  
227 the degradation of TAGs culminates in trehalose, we applied the previously developed method  
228 of metabolic labelling with <sup>14</sup>C-acetate in combination with 2D-TLC<sup>4,25</sup>. The <sup>14</sup>C-acetate  
229 metabolized by the worms is incorporated into TAGs. Upon degradation of TAGs, <sup>14</sup>C-acetyl  
230 CoA is released which acts as a precursor for trehalose biosynthesis. As shown in Fig. 4C,  
231 preconditioning led to a huge increase of radioactivity in trehalose and to a small increase in  
232 some amino acids (glycine/serine, phenylalanine; panels c and d). Interestingly,  
233 *Panagrolaimus n. sp.* displayed an additional spot (Fig. 4D, enumerated as 7), that was not  
234 found in *C. elegans*. We identified this spot as trehalose-6-phosphate (Fig.S5C-H), a precursor  
235 of trehalose, based on the fragmentation pattern of the molecule, using mass spectrometry.  
236 Thus, to resist harsh desiccation, like *C. elegans* dauer larvae, *Panagrolaimus n. sp.* might  
237 utilize the glyoxylate shunt and consequently acetate derived from TAGs to synthesize  
238 trehalose. Detection of the immediate precursor (trehalose-6-phosphate) suggests that the flux  
239 of metabolites is intense in *Panagrolaimus n. sp.* Finally, we investigated whether *C. elegans*  
240 dauer larvae can also survive in prolonged cryptobiotic state. Despite preconditioning, the  
241 survival ability of desiccated dauer larvae at room temperature declines very rapidly, with most  
242 larvae dead after almost 10 days (Fig. 4E) (Fig. S4A&B). Direct freezing without any  
243 cryoprotectants at -80°C leads to instant death of the animals. To test whether combining these  
244 conditions could extend the viability of dauer larvae (Fig. S4A&B), we transferred the  
245 desiccated larvae to -80°C. Remarkably, under these conditions, there was no significant  
246 decline in viability even after 480 days (Fig. 4E). Moreover, after thawing the animals resumed  
247 reproductive growth and produced progeny in numbers like those of animals kept under control

248 conditions (Fig. 4F). Since we did not observe any reduction in the survival at any time points,  
249 this suggests that the combination of anhydrobiosis and freezing can prolong the survival  
250 ability of dauer larvae. Thus, *C. elegans* dauer larvae, when exposed to combination of  
251 cryptobiotic states can survive for extremely long periods of time.

252

## 253 Discussion

254 The new nematode species from permafrost can now be placed into the genus *Panagrolaimus*<sup>41</sup>,  
255 which contains several described parthenogenetic and gonochoristic species<sup>30,42</sup>. Many  
256 *Panagrolaimus* display adaptation to survival in harsh environments<sup>21</sup> and the genus includes  
257 the Antarctic species *P. davidi*<sup>22</sup>. The genus *Panagrolaimus* is exceptional in its morphological  
258 uniformity even among nematode species that are hard to classify based on morphology in  
259 general. Thus, species designation via microscopic (including SEM) analysis is unreliable,  
260 which is further complicated by the absence of males in parthenogenetic species. Males have  
261 an important diagnostic feature such as spicules and pericloacal papillae, females differ from  
262 one species to another mainly by morphometrics, where interspecies differences (absolute  
263 measures and ratios) might be subtle. Our specimens are similar based on absolute sizes and  
264 ratios to females of the bisexual species *Panagrolaimus detritophagus*<sup>43</sup>. The only non-  
265 overlapping morphometric character is index “b” (body length: pharynx length): 5.6–6.8 in  
266 *Panagrolaimus n. sp.* versus 4.4–5.1 in *P. detritophagus*.

267 Consequently, we turned to phylogenomic methods under the phylogenetic species  
268 concept to place the species on the tree. This showed that this species is an outgroup to other  
269 known *Panagrolaimus* species, raising the possibility of a second independent evolution of  
270 parthenogenesis in the genus, in contrast to previous findings<sup>42,31,30</sup>. Alternatively, the hybrid  
271 origin of parthenogenetic *Panagrolaimus* could influence the phylogenetic positioning of  
272 strains, raising the possibility that the new species is a true sister to the other parthenogenetic  
273 strains. To fully resolve the phylogenetic positioning further, extensive sampling, and genome  
274 sequencing of *Panagrolaimus* species is needed. We found *Panagrolaimus n. sp.* to be triploid  
275 and thus a hybrid origin is possible, as seen in other parthenogenetic *Pangrolaimus*<sup>30</sup>. The  
276 highly contiguous genome of *Panagrolaimus n. sp.* will allow for analyses of this trait in  
277 comparison to other *Panagrolaimus* species currently being genome sequenced.

278 Our results provide a deeper insight into the homology of molecular and biochemical  
279 mechanisms between *C. elegans* and *P. kolymaensis*, which are not only taxonomically but  
280 also ecologically distinct. *C. elegans* can mostly be found in rotting fruits and plants in

281 temperate regions<sup>44,45</sup>, while *Panagrolaimus* species are globally distributed and prevalent in  
282 leaf litter and soil<sup>42</sup>, including in harsh environments<sup>21</sup>. We show through orthology analysis  
283 that the well-studied molecular pathways used by *C. elegans* larvae to enter the dauer state,  
284 such as insulin<sup>46,47</sup> (DAF-11, DAF-2 & DAF-16), TGF- $\beta$ <sup>48</sup> (DAF-7), steroid<sup>49</sup> (DAF-9, DAF-  
285 12) are present in the genome of the *Panagrolaimus n. sp.* (Fig.S4C). The presence of  
286 homologous genes in two species does not necessarily demonstrate their functionality in both.  
287 Therefore, further functional analyses are needed to study molecular pathways in detail.  
288 Trehalose accumulation (Fig.4B) and depletion of triacylglycerols (Fig.S5A&B) ensures the  
289 functionality of trehalose biosynthesis pathway and utilization of glyoxylate shunt during  
290 desiccation in *Panagrolaimus n. sp.* Without the activity of the enzyme TPS-2 and glyoxylate  
291 shunt, it is unfeasible to synthesize trehalose in nematodes. We do not eliminate the possibility  
292 of other biochemical features that might contribute to desiccation survival ability of  
293 *Panagrolaimus n. sp.*, but with regards to trehalose biosynthesis and the glyoxylate shunt, our  
294 data suggest that molecular tool kit is partially orthologous. In our future studies, we intend to  
295 perform RNAi based experiments to infer the concrete mechanisms. Our results hint at  
296 convergence or parallelism in the molecular mechanisms organizing dauer formation and  
297 cryptobiosis.

298         As mentioned above, preconditioning enhances the survival of *Panagrolaimus n. sp.*  
299 by rendering them desiccation tolerant. We previously reported that preconditioning elevates  
300 trehalose biosynthesis in *C. elegans* dauer larvae and the elevated trehalose renders desiccation  
301 tolerance by protecting the cellular membranes<sup>24</sup>. It is not surprising that *Panagrolaimus n. sp.*  
302 upregulates trehalose, however the magnitude of trehalose elevation is higher than *C. elegans*  
303 dauer larvae. This indicates that central regulators (DAF-16, DAF-12) of trehalose  
304 upregulation may differentially regulate *tps-2* in *Panagrolaimus n. sp.*<sup>50,51,34</sup>. Although  
305 *Panagrolaimus n. sp.* utilizes the glyoxylate shunt and gluconeogenesis to upregulate trehalose  
306 levels, it is intriguing to observe that they accumulate substantial levels of trehalose-6-  
307 phosphate. Further investigation of this observation using RNAi or inhibitor-based experiments  
308 will provide insights into molecular mechanisms of metabolic regulation in *Panagrolaimus n.*  
309 *sp.* upon preconditioning. Our findings for the first time demonstrate that *C. elegans* dauer  
310 larvae possess an inherent ability to survive freezing for prolonged periods if they undergo  
311 anhydrobiosis. It is tempting to speculate that undergoing anhydrobiosis might be a survival  
312 strategy of *C. elegans* to survive the seasonal changes in nature.

313           In summary our findings indicate that by adapting to survive cryptobiotic state for  
314 short time frames in environments like permafrost, some nematode species gained the potential  
315 for individual worms to remain in the state for geological timeframes. This raises the question  
316 whether there is an upper limit to the length of time an individual can remain in the cryptobiotic  
317 state. Long timespans may be limited only by drastic changes to the environment such as strong  
318 fluctuations in ambient temperature, natural radioactivity, or other abiotic factors. These  
319 findings have implications for our understanding of evolutionary processes, as generation times  
320 may be stretched from days to millennia, and long-term survival of individuals of species can  
321 lead to the refoundation of otherwise extinct lineages. This is particularly interesting in the case  
322 of parthenogenetic species, as each individual can found a new population without the need for  
323 mate finding, i.e. evading the cost of sex. Finally, understanding the precise mechanisms of  
324 long-term cryptobiosis and cues that lead to successful revivals can inform new methods for  
325 long term storage of cells and tissues.

## 326 **Methods**

### 327 **Materials and *C. elegans* strains**

328 [1-<sup>14</sup>C] -acetate (sodium salt) was purchased from Hartmann Analytic (Braunschweig,  
329 Germany). All other chemicals were purchased from Sigma-Aldrich (Taufkirchen, Germany).  
330 The *Caenorhabditis* Genetic Centre (CGC) which is funded by NIH Office of Research  
331 Infrastructure Programs (P40 OD010440) provided *daf-2(e1370)* and *E. coli NA22* strains.

332

### 333 **Genomic DNA isolation from *Panagrolaimus n. sp* nematodes**

334 After isolation (Supplementary Information), to ensure our strain *Panagrolaimus n. sp.* (Pn2-  
335 1) can adapt to different laboratories, we grew them for multiple generations. The strain was  
336 in culture for several generations during genomic DNA isolation and was frozen after genomic  
337 DNA isolation was performed. *Panagrolaimus n. sp.* nematodes (isofemale strain Pn2-1) were  
338 grown on several plates of NGM agar plated with *E. coli NA22* bacteria at 20°C. Worms were  
339 collected from the plates, washed with water at least three to five times by centrifugation at  
340 1000 g to remove any residual bacteria and any debris. The worm pellet was dissolved in 5  
341 volumes of worm lysis buffer (0.1M Tris-HCl pH=8.5, 0.1M NaCl, 50mM EDTA pH=8.0) and  
342 distributed in 1.5 ml of microcentrifuge tubes. These tubes are incubated at -80°C for 20  
343 minutes. 100 µl of Proteinase ‘K’ (20 mg/ml) was added to each tube and they are incubated  
344 at 60°C overnight. 625 µl of cold GTC buffer (4M Guanidinium Thiocyanate, 25mM Sodium  
345 citrate, 0.5% (v/v) N-lauroylsarcosine, 7%(v/v) Beta Mercaptoethanol) was added to the tube,  
346 incubated on ice 30 min, and mixed by inverting every 10 min. 1 volume of phenol–  
347 chloroform-isoamyl alcohol (pH=8) was added to the lysate and mixed by inverting the tube  
348 10-15 times. Tubes were centrifuged for 5 min at 10,000 g at 4°C to separate the phases. The  
349 upper aqueous phase was carefully collected into a fresh tube. One volume of fresh chloroform  
350 was added and mixed by inverting the tubes for 10-15 times and centrifuged for 5 min at 10,000  
351 g at 4°C to separate the phases. One volume of cold 5 M NaCl was added, mixed by inverting  
352 the tubes and incubated on ice for 15 min. After incubation these tubes were centrifuged for 15  
353 min at 12,000–16,000 g at 4°C. The supernatant containing the nucleic acids were slowly  
354 transferred into a fresh tube. One volume of isopropanol was added to the tube, inverted few  
355 times, and incubated on ice for 30 minutes. After incubation, the tubes were centrifuged at  
356 3000 g for 30–45 min at 25°C and the supernatant was discarded without disturbing the pellet.  
357 The pellet was washed twice with 1 ml of 70% ethanol, tubes were centrifuged at 3000 g for 5  
358 min and supernatant was discarded and incubated at 37°C for 10-15 min to dry the pellet. The

359 pellet was resuspended carefully in TE buffer. The quality of the genomic DNA was analyzed  
360 with pulse field gel electrophoresis.

361

### 362 **Genome sequencing and assembly**

363 The long insert library was prepared as recommended by Pacific Biosciences according to the  
364 ‘Procedure & Checklist-Preparing gDNA Libraries Using the SMRTbell® Express Template  
365 Preparation Kit 2.0’ protocol. In summary, RNase treated HMW gDNA was sheared to 20 kb  
366 fragments on the MegaRuptor™ device (Diagenode) and 10 µg sheared gDNA was used for  
367 library preparation. The PacBio SMRTbell™ library was size selected in two fractions (9-  
368 13kb, > 13kb) using the BluePippin™ device with cassette definition of 0.75% DF MarkerS1  
369 3-10 kb Improved Recovery. The second fraction of the size-selected library was loaded with  
370 95 pM on plate on a Sequel SMRT cell (8M). Sequel polymerase 2.0 was used in combination  
371 with the v2 PacBio sequencing primer and the Sequel sequencing kit 2.0EA, with a runtime of  
372 30 hours. We created PacBio CCS reads from the subreads .bam file using PacBio’s ccs  
373 command linetool (version 4.2.0), outputting 8.5Gb of high-quality CCS reads (HiFi reads N50  
374 of 14.4 kb). HiCanu (version 2.2)<sup>39</sup> was used to create the contig assembly. Blobtools<sup>53</sup> (version  
375 1.1.1) was used to identify and remove bacterial contigs. The final triploid contig assembly  
376 consists of 856 contigs has a N50 of 3.82 Mb and a size of 266Mb. The mitochondrial genome  
377 was created with the mitoHifi pipeline (version 2, <https://github.com/marcelauliano/MitoHiFi>)  
378 based on the assembled contigs and the closely related reference mitochondrial genome of  
379 *Panagrellus redivivus* (strain: PS2298/MT8872, ENAaccession: AP017464). The mitoHifi  
380 pipeline identified 49 mitochondrial contigs ranging from 13-32Kb. The final annotated  
381 circular mitochondrial genome has a length of 17467 bp.

382 To identify pseudohaplotypes in the *Panagrolaimus n. sp.* genome assembly, we  
383 selected the longest isoform of each predicted protein-coding gene in our assembly and in the  
384 *C. elegans* genome (downloaded from WormBase Parasite, release WBPS15) using AGAT  
385 (version 0.4.0) and clustered them into orthologous groups (OGs) using OrthoFinder (version  
386 2.5.2). We identified OGs that contained three *Panagrolaimus* sequences (i.e. groups that were  
387 present as single-copy in all three pseudohaplotypes) and used these to identify trios of multi-  
388 megabase size contigs derived from the three pseudohaplotypes. Synteny between the three  
389 pseudohaplotypes was visualized using Circos to plot the positions of each homeolog (version  
390 0.69-8).

391

## 392 **Genome annotation**

393 RepeatModeler 1.0.8 (<http://www.repeatmasker.org/>) was used with parameter ‘-engine ncbi’  
394 to create a library of repeat families which was used with RepeatMasker 4.0.9 to soft-mask the  
395 *Panagrolaimus* genome. To annotate genes, we cross mapped protein models from an existing  
396 *Panagrolaimus* as external evidence in the Augustus based pipeline. The completeness of our  
397 predictions was evaluated using BUSCO on the gVolante web interface.

398

## 399 **Orthology analysis**

400 We conducted a gene orthology analysis using genomic data from *Panagrolaimus n. sp.*, the  
401 Plectid nematode species from the permafrost, as well as genomic data from WormBase  
402 Parasite (<https://parasite.wormbase.org>; accessed 17/12/2020): *Caenorhabditis elegans*,  
403 *Diploscapter coronatus*, *Diploscapter pachys*, *Halicephalobus mephisto*, *Panagrellus*  
404 *redivivus*, *Panagrolaimus davidi*, *Panagrolaimus* sp. ES5, *Panagrolaimus* sp. PS1159,  
405 *Panagrolaimus superbus*, *Plectus sambesii*, and *Propanagrolaimus* sp. JU765. For plectids,  
406 genomic resources are scarce. We therefore added transcriptome data of *Plectus murrayi*,  
407 *Anaplectus granulatus*, *Neocamacolaimus parasiticus*, and *Stephanolaimus elegans*, with the  
408 latter three transcriptomes kindly provided by Dr. Oleksandr Holovachov (Swedish museum  
409 of natural history). Transcriptomes for *Anaplectus granulatus*, and *Neocamacolaimus*  
410 *parasiticus* have been published and are readily available<sup>55,56</sup>. All three transcriptomes were  
411 assembled *de novo* with Trinity<sup>57</sup>. The exact procedures are described in the respective  
412 publications<sup>55,56</sup>. The *Stephanolaimus elegans* transcriptome was assembled using the same  
413 methodologies as *Neocamacolaimus parasiticus*.

414 The *Plectus murrayi* transcriptome was built from raw reads deposited at NCBI  
415 ([https://sra-downloadb.be-md.ncbi.nlm.nih.gov/sos2/sra-pub-run-](https://sra-downloadb.be-md.ncbi.nlm.nih.gov/sos2/sra-pub-run-13/SRR6827978/SRR6827978.1)  
416 [13/SRR6827978/SRR6827978.1](https://sra-downloadb.be-md.ncbi.nlm.nih.gov/sos2/sra-pub-run-13/SRR6827978/SRR6827978.1); accessed 22.12.2020) and assembled using Galaxy Trinity  
417 version 2.9.1<sup>58, 57</sup>. All default options were used including *in silico* normalization of reads  
418 before assembly. Transdecoder (conda version 5.5.0)<sup>59</sup> was used to translate to amino acid  
419 sequence. Identical reads were removed with cd-hit version 4.8.1<sup>60,61</sup>, with shorter isoforms  
420 removed using the Trinity `get_longest_isoform_seq_per_trinity_gene.pl` command<sup>59</sup> (Trinity  
421 conda version 2.8.5; Anaconda Software Distribution, Conda, Version 4.9.2, Anaconda, Nov.  
422 2020). Amino acid translations of the longest isoforms were extracted with AGAT (Dainat,  
423 <https://www.doi.org/10.5281/zenodo.3552717>) from genome assembly FASTA files and  
424 genome annotation GFF3 files using the ‘`agat_convert_sp_gxf2gxf.pl`’,

425 ‘agat\_sp\_keep\_longest\_isoform.pl’ and ‘agat\_sp\_extract\_sequences.pl’ scripts, respectively.  
426 All FASTA headers were modified to allow for simple species assignment of each sequence in  
427 subsequent analysis. Orthology analysis was conducted with OrthoFinder v. 2.5.1<sup>62,63</sup> using  
428 default settings. For genes of interest, we constructed alignments with MAFFT v. 7.475<sup>64</sup> using  
429 the localpair and maxiterate (1000) functions. Spurious sequences and areas that were not well  
430 aligned were removed with Trimal v. 1.4.rev22<sup>65</sup> (procedure stated in supplementary file  
431 Orthology analysis below each phylogeny). We then ran phylogenetic analysis with Iqtree2 v.  
432 2.0.6<sup>66</sup>, with -bb 1000 option, testing the model for each analysis (models eventually used  
433 stated in supplementary file Orthology analysis). PFAM domains were explored using  
434 Interproscan v. 5.50-84.0<sup>67</sup>. The phylogenies were visualized with Dendroscope 3.7.6<sup>68</sup> and  
435 figures were created with Inkscape (<https://inkscape.org>). The majority of our analysis was  
436 performed on the HPC RRZK CHEOPS of the Regional Computing Centre (RRZK) of the  
437 University of Cologne.

438

### 439 **Phylogenomics**

440 Sequences of 18S and 28S genes from 44 taxa across the *Propanagrolaimus*, *Panagrolaimus*,  
441 *Panagrellus* and *Halicephalobus* genera (all listed in Supplementary information) were aligned  
442 (MAFFT L-INS-I v7.475)<sup>64</sup>, concatenated<sup>69</sup> and used to infer a species tree using maximum  
443 likelihood via (IQTREE)<sup>70</sup> and partitioned by best-fit models of sequence evolution for both<sup>71</sup>.  
444 Nodal support was determined using 1000 bootstrap pseudoreplicates. A further 60 genes from  
445 101 taxa (all listed in Supplementary information) were used to confirm the taxonomic position  
446 using the supermatrix concatenation methods outlined above. Given the limitations of  
447 differential gene sampling, we expanded our phylogenomic analyses to include a coalescence  
448 approach using 12,295 ML gene trees inferred for orthogroups containing the target animal.  
449 Instances of multiple genes per species per group were treated as paralogs/orthologs and  
450 analysed using ASTRAL-Pro<sup>72</sup>. Given the number of copies of genes per orthogroup, we  
451 explored whether auto or allopolyploidy was the source of extra genes observed using the gene-tree  
452 reconciliation approach implemented in GRAMPA (Gene-tree Reconciliation Algorithm with  
453 MUL (Multi labelled)-trees for Polyploid Analysis)<sup>75</sup>. All gene trees rooted at the midpoint and  
454 the final ASTRAL-pro species tree were used as inputs, with the most parsimonious result  
455 analyzed further.

456

457



458 **Desiccation survival assay**

459 *C. elegans* dauer larvae desiccation assays were performed as described in<sup>24</sup>. *Panagrolaimus*  
460 *n. sp* desiccation assays were performed similarly as described in<sup>24</sup> with mixed population  
461 (Mixture of all larval stages and adults) of the nematodes.

462

463 **Exposure of nematodes to extreme environments**

464 *C. elegans* dauer larvae or mixed population (Mixture of all larval stages and adults) of  
465 *Panagrolaimus n. sp* nematodes were preconditioned and desiccated as described in<sup>24</sup>, then  
466 transferred to elevated temperature of 34°C, freezing (-80°C) and anoxia. Anoxic environment  
467 was generated in a desiccation chamber at 60%RH by flushing the Nitrogen gas into the  
468 chamber. The concentration of oxygen inside the chamber was monitored. After each timepoint  
469 they were rehydrated with 500 µl of water for 2-3 hours. Rehydrated worms were transferred  
470 to NGM agar plates with *E. Coli NA22* as food. Survivors were counted after overnight  
471 incubation at 15°C. Each experiment was performed on two different days with at least two  
472 technical replicates.

473

474 **Trehalose quantification from nematode lysates**

475 Trehalose measurements were performed as described in previous reports<sup>25</sup>.

476

477 **Radiolabeling, metabolite extraction and 2D-TLC**

478 The above-mentioned procedures were performed according to previous reports<sup>3,25</sup>.

479 **Identification of trehalose-6-phosphate from TLC plates**

480 Normalized aqueous fractions from the non-preconditioned and preconditioned samples were  
481 separated by high performance thin layer chromatography (HPTLC), using 1-propanol-  
482 methanol-ammonia (32%)-water (28:8:7:7 v/v/v/v) as first, dried for 15 min and 1-butanol-  
483 acetone-glacial acetic acid–water (35:35:7:23 v/v/v/v) second dimension respectively. Using  
484 the trehalose as a standard on both dimensions of the TLC, the regions of interest were scrapped  
485 out from the TLCs. The scraped-out silica was extracted with 10 ml of 50% methanol twice.  
486 The fractions were combined, dried under vacuum and dissolved in 100 µl of MS mix solution  
487 containing 4:2:1 (Isopropanol:Methanol:Chloroform) with 7.5 mM ammonium formate. Mass  
488 spectrometric analysis was performed on a Q Exactive instrument (Thermo Fischer Scientific,  
489 Bremen, DE) equipped with a robotic nanoflow ion source TriVersa NanoMate (Advion  
490 BioSciences, Ithaca, USA) using nanoelectrospray chips with a diameter of 4.1 µm. The ion

491 source was controlled by the Chipsoft 8.3.1 software (Advion BioSciences). Ionization voltage  
492 was + 0.96 kV in negative mode; backpressure was set at 1.25 psi. The temperature of the ion  
493 transfer capillary was 200°C; S-lens RF level was set to 50%. FT MS spectra were acquired  
494 within the range of m/z 50–750 at the mass resolution of R m/z 200 = 140000; automated gain  
495 control (AGC) of  $3 \times 10^6$  and with the maximal injection time of 3000 ms. FT MS/MS spectra  
496 were acquired within the range of m/z 50–750 at the mass resolution of R m/z 200 = 140000;  
497 automated gain control (AGC) of  $3 \times 10^4$  and with a maximal injection time of 30 s.

498

#### 499 **Triacylglycerols measurement from *Panagrolaimus n. sp* lysates**

500 Non-preconditioned and preconditioned pellets were lysed in 200  $\mu$ l of isopropanol with 0.5  
501 mm Zircornium beads twice for 15 min. The lysates were centrifuged at 1300 g for 5 min. The  
502 supernatant was carefully collected without any debris, 20  $\mu$ l of the lysate was used for protein  
503 estimation. Normalization was performed according to soluble protein levels, supernatant  
504 volumes corresponding to 50-100  $\mu$ g of proteins were dried in the desiccator. 700  $\mu$ l of IS  
505 ((10:3 (Methyl tert-butyl ether: ethanol)) mix (warmed to room temperature) was added to  
506 dried samples and left on the shaker for 1 hour. The samples were centrifuged at 1400 rpm and  
507 4°C. 140  $\mu$ l of water was added and left on the shaker for 15 min. These samples were  
508 centrifuged at 13400 rpm for 15 min. The upper organic fraction was collected and transferred  
509 to 1.5 ml glass vial and left for drying in the desiccator. The dried samples were reconstituted  
510 in a volume of 300  $\mu$ l of 4:2:1 (Isopropanol:Methanol:Chloroform). Volume corresponding to  
511 1  $\mu$ g was used for injection.

512 LC-MS/MS analysis was performed on a high-performance liquid chromatography  
513 system (Agilent 1200 HPLC) coupled to a Xevo G2-S QToF (Waters). The samples were  
514 resolved on a reverse phase C18 column (Cortecs C18 2.7 $\mu$ m from Waters) with  
515 50:50:0.1:1% (Water:Methanol:Formic acid:1M Ammonium formate) and 25:85:0.1:1%  
516 (Acetonitrile:Isopropanol:Formic acid:1M Ammonium formate) as mobile phase. The  
517 following gradient program was used: Eluent B from 0 % to 100 % within 12 min; 100 % from  
518 12 min to 17min; 0 % from 17 min to 25 min. The flow rate was set at 0.3 ml/min. The samples  
519 were normalised according to the total protein concentration and the worm numbers. TAG  
520 50:00:00 was used as internal standard. Skyline software  
521 (<https://skyline.ms/project/home/software/Skyline/begin.view>) was used to analyse the raw  
522 data. TAGs were extracted from Lipidmaps (<https://www.lipidmaps.org/>) database.

523

524 **Author contributions**

525 AS, VG, PS, TK conceived and designed the study. AS, VG, TH, MP, AT, GH, MH, ER, PS  
526 and TK contributed to the original draft. AS performed cultivation of nematodes, provided  
527 samples for scanning electron microscopy and radiocarbon dating. VG performed desiccation  
528 survival assays, trehalose measurement, 2D-TLC of metabolites, trehalose-6-phosphate  
529 detection, combination of cryptobiosis experiments, genomic DNA isolation from  
530 *Panagrolaimus n. sp.*, assembled the data from all the authors, prepared the figures, revised,  
531 and submitted the manuscript. MP performed genome assembly. TH conducted orthology  
532 analyses and single gene phylogenies and contributed to figures. AT provided morphological  
533 description, light, and scanning electron microscopy. LS analyzed the genome assembly and  
534 created figures. GMH performed the phylogenetic, MUL analyses and proofread the  
535 manuscript. ST performed triacylglycerols measurements, trehalose-6-phosphate detection  
536 with suggestions from Andrej Shevchenko. MH annotated supplementary table 3. PS performed  
537 genome annotation and supervised TH and LS. EWM supervised MP and had overall  
538 responsibility for sequencing and assembly including funding it.

539

540

541

542

543

544

545

546

547

548

549

550

551

552

553

554

555

## 556 **Acknowledgements**

557 VG is thankful to Andrej Shevchenko, members of Kurzchalia lab for helpful discussions and  
558 the core facilities of MPI-CBG for assistance. We are grateful to Dr. S. Gubin for field study  
559 and sampling, our colleagues in Soil Cryology Lab, Pushchino and North-East Scientific  
560 Station in Chersky, Republic of Sakha (Yakutia) for their help and cooperation. The authors  
561 thank Long Read Team of the DRESDEN-concept Genome Center, DFG NGS Competence  
562 Center, part of the Center for Molecular and Cellular Bioengineering (CMCB), Technische  
563 Universität Dresden and MPI-CBG. GMH is funded by a UCD Ad Astra Fellowship. This work  
564 was supported by the Russian Foundation for Basic Research (19-29-05003-mk) to AS and  
565 ER. VG and TK acknowledge the financial support from the Volkswagen Foundation (Life?  
566 research grant 92847). PS and TH are supported by a DFG ENP grant to PS (DFG project  
567 434028868). The authors are thankful to Richard Roy and Jens Bast for critical reading the  
568 manuscript. We thank Iain Pattern for suggestions on writing the manuscript. The funders have  
569 no role in the design of the study.

570

571

572

573

574

575

576

577

578

579

580

581

582

583

584 **Conflict of interest:**

585 The authors declare they have no conflict of interest relating to the content of this article.

586  
587  
588  
589  
590  
591  
592  
593  
594  
595  
596  
597  
598  
599  
600  
601  
602  
603  
604  
605  
606  
607  
608  
609  
610  
611  
612  
613  
614  
615  
616  
617  
618  
619  
620  
621  
622  
623  
624  
625  
626  
627  
628

629 **References**

- 630 1. Hibshman, J. D., Clegg, J. S. & Goldstein, B. Mechanisms of Desiccation Tolerance:  
631 Themes and Variations in Brine Shrimp, Roundworms, and Tardigrades. *Front. Physiol.* **11**,  
632 592016 (2020).
- 633 2. Erkut, C. *et al.* Molecular Strategies of the *Caenorhabditis elegans* Dauer Larva to Survive  
634 Extreme Desiccation. *PLoS ONE* **8**, e82473 (2013).
- 635 3. Gade, V. R., Traikov, S., Oertel, J., Fahmy, K. & Kurzchalia, T. V. *C. elegans* possess a  
636 general program to enter cryptobiosis that allows dauer larvae to survive different kinds of  
637 abiotic stress. *Sci. Rep.* **10**, 13466 (2020).
- 638 4. Shatilovich, A. V. *et al.* Viable Nematodes from Late Pleistocene Permafrost of the Kolyma  
639 River Lowland. *Dokl. Biol. Sci.* **480**, 100–102 (2018).
- 640 5. Shmakova, L. *et al.* A living bdelloid rotifer from 24,000-year-old Arctic permafrost. *Curr.*  
641 *Biol.* **31**, R712–R713 (2021).
- 642 6. Keilin, D. The Leeuwenhoek Lecture - The problem of anabiosis or latent life: history and  
643 current concept. *Proc. R. Soc. Lond. Ser. B - Biol. Sci.* **150**, 149–191 (1959).
- 644 7. Cano, R. & Borucki, M. Revival and identification of bacterial spores in 25- to 40-million-  
645 year-old Dominican amber. *Science* **268**, 1060–1064 (1995).
- 646 8. Shen-Miller, J. Sacred lotus, the long-living fruits of China Antique. *Seed Sci. Res.* **12**, 131–  
647 143 (2002).
- 648 9. Guidetti, R. & Jönsson, K. I. Long-term anhydrobiotic survival in semi-terrestrial  
649 micrometazoans. *J. Zool.* **257**, 181–187 (2002).
- 650 10. Tsujimoto, M., Imura, S. & Kanda, H. Recovery and reproduction of an Antarctic tardigrade  
651 retrieved from a moss sample frozen for over 30 years. *Cryobiology* **72**, 78–81 (2016).
- 652 11. Kagoshima, H. *et al.* Multi-decadal survival of an Antarctic nematode, *Plectus murrayi*, in  
653 a -20°C stored moss sample. *CryoLetters* **33**, 280–288 (2012).
- 654 12. Steiner, G. & Florence E, A. Resuscitation of the nematode *Tylenchus polyhypnus*, n. sp.,  
655 after almost 39 years' dormancy. *J. Wash. Acad. Sci.* **36**, 97–99.
- 656 13. Gilichinsky, D. A. *et al.* Microbial Populations in Antarctic Permafrost: Biodiversity, State,  
657 Age, and Implication for Astrobiology. *Astrobiology* **7**, 275–311 (2007).
- 658 14. Rivkina, E. *et al.* Earth's perennially frozen environments as a model of cryogenic planet  
659 ecosystems. *Permafr. Periglac. Process.* **29**, 246–256 (2018).

- 660 15.Sipes, K. *et al.* Eight Metagenome-Assembled Genomes Provide Evidence for Microbial  
661 Adaptation in 20,000- to 1,000,000-Year-Old Siberian Permafrost. *Appl. Environ.*  
662 *Microbiol.* **87**, (2021).
- 663 16.Liang, R. *et al.* Genomic reconstruction of fossil and living microorganisms in ancient  
664 Siberian permafrost. *Microbiome* **9**, 110 (2021).
- 665 17.Gilichinsky, D. A. & Rivkina, E. M. Permafrost Microbiology. *7* (2011).
- 666 18.Yashina, S. *et al.* Regeneration of whole fertile plants from 30,000-y-old fruit tissue buried  
667 in Siberian permafrost. *Proc. Natl. Acad. Sci.* **109**, 4008–4013 (2012).
- 668 19.Adhikari, B. N., Wall, D. H. & Adams, B. J. Desiccation survival in an Antarctic nematode:  
669 molecular analysis using expressed sequenced tags. *BMC Genomics* **10**, 69 (2009).
- 670 20.Tyson, T. *et al.* A molecular analysis of desiccation tolerance mechanisms in the  
671 anhydrobiotic nematode *Panagrolaimus superbus* using expressed sequenced tags. *BMC*  
672 *Res. Notes* **5**, 68 (2012).
- 673 21.McGill, L. M. *et al.* Anhydrobiosis and Freezing-Tolerance: Adaptations That Facilitate the  
674 Establishment of *Panagrolaimus* Nematodes in Polar Habitats. *PLOS ONE* **10**, e0116084  
675 (2015).
- 676 22.Thorne, M. A. S., Kagoshima, H., Clark, M. S., Marshall, C. J. & Wharton, D. A. Molecular  
677 Analysis of the Cold Tolerant Antarctic Nematode, *Panagrolaimus davidi*. *PLoS ONE* **9**,  
678 e104526 (2014).
- 679 23.Sandhove, J., Spann, N. & Ristau, K. The Anhydrobiotic Potential of the Terrestrial  
680 Nematodes *Plectus parietinus* and *Plectus velox*: Anhydrobiosis OF *Plectus parietinus* and  
681 *P. velox*. *J. Exp. Zool. Part Ecol. Genet. Physiol.* **325**, 434–440 (2016).
- 682 24.Erkut, C. *et al.* Trehalose Renders the Dauer Larva of *Caenorhabditis elegans* Resistant to  
683 Extreme Desiccation. *Curr. Biol.* **21**, 1331–1336 (2011).
- 684 25.Erkut, C., Gade, V. R., Laxman, S. & Kurzchalia, T. V. The glyoxylate shunt is essential  
685 for desiccation tolerance in *C. elegans* and budding yeast. *elife* **5**, (2016).
- 686 26.Zanina, O. G., Gubin, S. V., Kuzmina, S. A., Maximovich, S. V. & Lopatina, D. A. Late-  
687 Pleistocene (MIS 3-2) palaeoenvironments as recorded by sediments, palaeosols, and  
688 ground-squirrel nests at Duvanny Yar, Kolyma lowland, northeast Siberia. *Quat. Sci. Rev.*  
689 **30**, 2107–2123 (2011).
- 690 27.Murton, J. B. *et al.* Palaeoenvironmental Interpretation of Yedoma Silt (Ice Complex)  
691 Deposition as Cold-Climate Loess, Duvanny Yar, Northeast Siberia: Palaeoenvironmental

- 692 Interpretation of Yedoma Silt, Duvanny Yar. *Permafr. Periglac. Process.* **26**, 208–288  
693 (2015).
- 694 28. Abramov, A., Vishnivetskaya, T. & Rivkina, E. Are permafrost microorganisms as old as  
695 permafrost? *FEMS Microbiol. Ecol.* **97**, fiae260 (2021).
- 696 29. Gilichinsky, D. A., Wagener, S. & Vishnevetskaya, T. A. Permafrost microbiology.  
697 *Permafr. Periglac. Process.* **6**, 281–291 (1995).
- 698 30. Schiffer, P. H. *et al.* Signatures of the Evolution of Parthenogenesis and Cryptobiosis in the  
699 Genomes of Panagrolaimid Nematodes. *iScience* **21**, 587–602 (2019).
- 700 31. Schiffer, P. H. *et al.* Developmental variations among Panagrolaimid nematodes indicate  
701 developmental system drift within a small taxonomic unit. *Dev. Genes Evol.* **224**, 183–188  
702 (2014).
- 703 32. Dey, A., Chan, C. K. W., Thomas, C. G. & Cutter, A. D. Molecular hyperdiversity defines  
704 populations of the nematode *Caenorhabditis brenneri*. *Proc. Natl. Acad. Sci.* **110**, 11056–  
705 11060 (2013).
- 706 33. Cutter, A. D. Divergence Times in *Caenorhabditis* and *Drosophila* Inferred from Direct  
707 Estimates of the Neutral Mutation Rate. *Mol. Biol. Evol.* **25**, 778–786 (2008).
- 708 34. Seybold, A. C., Wharton, D. A., Thorne, M. A. S. & Marshall, C. J. Investigating trehalose  
709 synthesis genes after cold acclimation in the Antarctic nematode *Panagrolaimus* sp. DAW1.  
710 *Biol. Open* bio.023341 (2017) doi:10.1242/bio.023341.
- 711 35. Evangelista, C. C. S. *et al.* Multiple genes contribute to anhydrobiosis (tolerance to extreme  
712 desiccation) in the nematode *Panagrolaimus superbus*. *Genet. Mol. Biol.* **40**, 790–802  
713 (2017).
- 714 36. Malavin, S., Shmakova, L., Claverie, J.-M. & Rivkina, E. Frozen Zoo: a collection of  
715 permafrost samples containing viable protists and their viruses. *Biodivers. Data J.* **8**, e51586  
716 (2020).
- 717 37. Krivushin, K. *et al.* Two Metagenomes from Late Pleistocene Northeast Siberian  
718 Permafrost. *Genome Announc.* **3**, e01380-14 (2015).
- 719 38. Zhou, J. *et al.* Phylogenetic diversity of a bacterial community determined from Siberian  
720 tundra soil DNA. *Microbiology* **143**, 3913–3919 (1997).
- 721 39. Kapterev, P. Anabiosis in the conditions of permanent congelation. *Izv Akad Nauk SSSR Ser*  
722 *Biol* **6**, 1073–1088 (1936).
- 723 40. Kapterev, P. New data on revitalization of organisms from perpetually frozen grounds. *CR*  
724 *Acad Sci URSS* **20**, 315–317 (1938).



- 725 41. Andrásy, I. *Klasse Nematoda*. (Gustav Fischer Verlag, 1984).
- 726 42. Lewis, S. C. *et al.* Molecular evolution in Panagrolaimus nematodes: origins of  
727 parthenogenesis, hermaphroditism and the Antarctic species *P. davidi*. *BMC Evol. Biol.* **9**,  
728 15 (2009).
- 729 43. Andrásy, I. *Free-living Nematodes of Hungary*. (Hungarian Natural History Museum,  
730 2005).
- 731 44. Schulenburg, H. & Félix, M.-A. The Natural Biotic Environment of *Caenorhabditis*  
732 *elegans*. *Genetics* **206**, 55–86 (2017).
- 733 45. Frézal, L. & Félix, M.-A. *C. elegans* outside the Petri dish. *eLife* **4**, e05849 (2015).
- 734 46. Gems, D. *et al.* Two pleiotropic classes of *daf-2* mutation affect larval arrest, adult behavior,  
735 reproduction, and longevity in *Caenorhabditis elegans*. *Genetics* **150**, 129–155 (1998).
- 736 47. Vowels, J. J. & Thomas, J. H. Multiple chemosensory defects in *daf-11* and *daf-21* mutants  
737 of *Caenorhabditis elegans*. *Genetics* **138**, 303–316 (1994).
- 738 48. Ren Peifeng *et al.* Control of *C. elegans* Larval Development by Neuronal Expression of a  
739 TGF- $\beta$  Homolog. *Science* **274**, 1389–1391 (1996).
- 740 49. Gerisch, B., Weitzel, C., Kober-Eisermann, C., Rottiers, V. & Antebi, A. A Hormonal  
741 Signaling Pathway Influencing *C. elegans* Metabolism, Reproductive Development, and  
742 Life Span. *Dev. Cell* **1**, 841–851 (2001).
- 743 50. Penkov, S. *et al.* Integration of carbohydrate metabolism and redox state controls dauer  
744 larva formation in *Caenorhabditis elegans*. *Nat. Commun.* **6**, 8060 (2015).
- 745 51. Penkov, S. *et al.* A metabolic switch regulates the transition between growth and diapause  
746 in *C. elegans*. *BMC Biol.* **18**, 31 (2020).
- 747 52. Nurk, S. *et al.* HiCanu: accurate assembly of segmental duplications, satellites, and allelic  
748 variants from high-fidelity long reads. *Genome Res.* **30**, 1291–1305 (2020).
- 749 53. Laetsch, D. R. & Blaxter, M. L. BlobTools: Interrogation of genome assemblies.  
750 *F1000Research* **6**, 1287 (2017).
- 751 54. Brůna, T., Hoff, K. J., Lomsadze, A., Stanke, M. & Borodovsky, M. BRAKER2: automatic  
752 eukaryotic genome annotation with GeneMark-EP+ and AUGUSTUS supported by a  
753 protein database. *NAR Genomics Bioinforma.* **3**, lqaa108 (2021).
- 754 55. Smythe, A. B., Holovachov, O. & Kocot, K. M. Improved phylogenomic sampling of free-  
755 living nematodes enhances resolution of higher-level nematode phylogeny. *BMC Evol. Biol.*  
756 **19**, 121 (2019).

- 757 56.Ahmed, M., Adedidran, F. & Holovachov, O. A draft transcriptome of a parasite  
758 *Neocamacolaimus parasiticus* (Camacolaimidae, Plectida). *J. Nematol.* **53**, 1–4 (2021).
- 759 57.Grabherr, M. G. *et al.* Full-length transcriptome assembly from RNA-Seq data without a  
760 reference genome. *Nat. Biotechnol.* **29**, 644–652 (2011).
- 761 58.Goecks, J., Nekrutenko, A., Taylor, J. & Galaxy Team, T. Galaxy: a comprehensive  
762 approach for supporting accessible, reproducible, and transparent computational research in  
763 the life sciences. *Genome Biol.* **11**, R86 (2010).
- 764 59.Haas, B. J. *et al.* De novo transcript sequence reconstruction from RNA-seq using the  
765 Trinity platform for reference generation and analysis. *Nat. Protoc.* **8**, 1494–1512 (2013).
- 766 60.Li, W. & Godzik, A. Cd-hit: a fast program for clustering and comparing large sets of  
767 protein or nucleotide sequences. *Bioinformatics* **22**, 1658–1659 (2006).
- 768 61.Fu, L., Niu, B., Zhu, Z., Wu, S. & Li, W. CD-HIT: accelerated for clustering the next-  
769 generation sequencing data. *Bioinformatics* **28**, 3150–3152 (2012).
- 770 62.Emms, D. M. & Kelly, S. OrthoFinder: solving fundamental biases in whole genome  
771 comparisons dramatically improves orthogroup inference accuracy. *Genome Biol.* **16**, 157  
772 (2015).
- 773 63.Emms, D. M. & Kelly, S. OrthoFinder: phylogenetic orthology inference for comparative  
774 genomics. *Genome Biol.* **20**, 238 (2019).
- 775 64.Katoh, K. & Standley, D. M. MAFFT Multiple Sequence Alignment Software Version 7:  
776 Improvements in Performance and Usability. *Mol. Biol. Evol.* **30**, 772–780 (2013).
- 777 65.Capella-Gutierrez, S., Silla-Martinez, J. M. & Gabaldon, T. trimAl: a tool for automated  
778 alignment trimming in large-scale phylogenetic analyses. *Bioinformatics* **25**, 1972–1973  
779 (2009).
- 780 66.Minh, B. Q. *et al.* IQ-TREE 2: New Models and Efficient Methods for Phylogenetic  
781 Inference in the Genomic Era. *Mol. Biol. Evol.* **37**, 1530–1534 (2020).
- 782 67.Jones, P. *et al.* InterProScan 5: genome-scale protein function classification. *Bioinformatics*  
783 **30**, 1236–1240 (2014).
- 784 68.Huson, D. H. & Scornavacca, C. Dendroscope 3: An Interactive Tool for Rooted  
785 Phylogenetic Trees and Networks. *Syst. Biol.* **61**, 1061–1067 (2012).
- 786 69.Kück, P. & Meusemann, K. FASconCAT: Convenient handling of data matrices. *Mol.*  
787 *Phylogenet. Evol.* **56**, 1115–1118 (2010).

- 788 70.Nguyen, L.-T., Schmidt, H. A., von Haeseler, A. & Minh, B. Q. IQ-TREE: A Fast and  
789 Effective Stochastic Algorithm for Estimating Maximum-Likelihood Phylogenies. *Mol.*  
790 *Biol. Evol.* **32**, 268–274 (2015).
- 791 71.Kalyaanamoorthy, S., Minh, B. Q., Wong, T. K. F., von Haeseler, A. & Jermin, L. S.  
792 ModelFinder: fast model selection for accurate phylogenetic estimates. *Nat. Methods* **14**,  
793 587–589 (2017).
- 794 72.Zhang, C., Scornavacca, C., Molloy, E. K. & Mirarab, S. ASTRAL-Pro: Quartet-Based  
795 Species-Tree Inference despite Paralogy. *Mol. Biol. Evol.* **37**, 3292–3307 (2020).
- 796 73.Ranallo-Benavidez, T. R., Jaron, K. S. & Schatz, M. C. GenomeScope 2.0 and Smudgeplot  
797 for reference-free profiling of polyploid genomes. *Nat. Commun.* **11**, 1432 (2020).
- 798 74.Kokot, M., Długosz, M. & Deorowicz, S. KMC 3: counting and manipulating k-mer  
799 statistics. *Bioinformatics* **33**, 2759–2761 (2017).
- 800 75.Thomas, GWC., Ather, H. S., Hahn, W. Matthew. Gene-Tree Reconciliation with MUL-  
801 Trees to Resolve Polyploidy Events. *Systematic Biology* **66**, 1007-1018 (2017).

802  
803  
804  
805  
806  
807  
808  
809  
810  
811  
812  
813  
814  
815  
816  
817  
818  
819  
820

821 **Figure legends**

822 **Figure 1. Study site.**

823 a) location of the Duvanny Yar outcrope on the Kolyma River, northeastern Siberia, Russia. b)  
824 view of the upper part of outcrop composed of ice wedges and permafrost silty deposits. c)  
825 lithostratigraphic scheme of deposits, showing location of studied rodent borrow (red circle).  
826 d) fossil rodent burrow with herbaceous litter and seeds buried in permafrost deposits; m a.r.l.  
827 = meters above river level.

828

829

830

831

832

833

834

835

836

837

838

839

840

841

842

843

844

845

846

847

848

849

850

851

852

853

854 **Figure 2. General morphology of *Panagrolaimus n. sp.*, female.**

855 Scanning electron pictures (a, c), light microscopy photographs (e, f) and graphic presentations  
856 (b, d, g) of holotype: a, b) entire body, c, d) anterior ends, e) anterior body, f) perivulvar body  
857 region, g) tail. Abbreviations: l.f. – lateral field, ov – ovary, pro – procorpus of the pharynx,  
858 t.b. – terminal bulb of the pharynx, u – uterus with eggs, v – vulva, v.p. – ventral pore. Scale  
859 bars: a, d, e, f, g – 20  $\mu\text{m}$ , b – 100  $\mu\text{m}$ , c – 2  $\mu\text{m}$ .

860

861

862

863

864

865

866

867

868

869

870

871

872

873

874

875

876

877

878

879

880

881

882

883

884

885

886

887 **Figure 3. Genome assembly and phylogenomics reveals that the newly discovered**  
888 ***Panagrolaimus n. sp* species is triploid.**

889 a) Kmer spectra of the *Panagrolaimus n. sp* PacBio HiFi data. Kmers of length 19 were counted  
890 using Jellyfish. b) Circos plot showing the triploid structure of the *Panagrolaimus n. sp*  
891 genome. Lines represent the position of 6,715 homeologs in eight contigs that comprise 39.9  
892 Mb (15%) of the assembly. Homeologs were identified by clustering protein-coding genes into  
893 orthogroups using OrthoFinder and selecting groups containing three sequences. Contig IDs  
894 and scale is shown. c) Inferred species tree for all taxa. The maximum likelihood tree inferred  
895 using a concatenated supermatrix (18S and 28S genes) with bootstrap support values is  
896 displayed. All genera are represented as monophyletic clades. *Panagrolaimus n. sp* is  
897 highlighted in red and basal to all other *Panagrolaimus* taxa. Internal nodes, where all  
898 subsequent branches represent identical sequences, are displayed with a black star. d)  
899 *Panagrolaimus n. sp* possesses *C. elegans* gene orthologs to enzymes required for TCA cycle,  
900 glyoxylate shunt, glycolysis, gluconeogenesis, trehalose synthesis, and polyamine synthesis.  
901 Black filled circles: Ortholog presence suggested by orthogroup clustering, phylogenetic  
902 analysis, and domain architecture. White filled circles: No ortholog found via current analysis.  
903 Coloured filled circles: Presence of *Panagrolaimus n. sp* gene(s), related to several *C. elegans*  
904 genes (all genes of same colour) that are all co-orthologous to that gene (those genes). Label:  
905 *C. elegans* enzyme names and orthogroup that contains that gene according to our orthogroup  
906 clustering.

907

908

909

910

911

912

913

914

915

916

917

918

919

920 **Figure 4. *C. elegans* dauer larvae and *Panagrolaimus n. sp.* might utilize similar**  
921 **mechanisms to survive cryptobiosis.**

922 a) Survival rate of *Panagrolaimus n. sp.* nematodes to desiccation and freezing (-80°C). Error  
923 bars indicate standard error of mean of two independent experiments with two technical  
924 replicates performed on two different days. Statistical comparison was performed using  
925 unpaired t test with Welch correction. n.s.  $p > 0.05$ , \*\*\*\* $p < 0.0001$ . For desiccation (non-  
926 preconditioned)  $n = 289$ , freezing (non-preconditioned)  $n = 675$ , desiccation (preconditioned  
927 at 98%RH)  $n = 953$  and freezing (preconditioned at 98%RH)  $n = 1295$ . b) *Panagrolaimus n.*  
928 *sp.* nematodes and *daf-2(e1370)* dauer larvae upregulate trehalose levels upon preconditioning  
929 at 98%RH. Error bars indicate standard error of mean of two independent experiments with  
930 three replicates performed on two different days. Statistical comparison was performed using  
931 two-way ANOVA with Holm-Sidak's multiple comparison test, \*\*\*\* $p < 0.0001$ . c-d) 2D-thin  
932 layer chromatography of <sup>14</sup>C-acetate labelled metabolites from *Panagrolaimus n. sp.* that were  
933 non-preconditioned and preconditioned at 98%RH. Enumerated spots indicate trehalose (1),  
934 glucose (2), glutamate (3), glutamine (4), serine/glycine (5) and phenylalanine (6).  
935 Representative images from at least two independent experiments performed on two different  
936 days. e) Desiccated *daf-2 (e1370)* dauer larvae survive to freezing (-80°C) for an extremely  
937 long period. Error bars indicate standard error of mean of two independent experiments with  
938 two technical replicates performed on two different days. f) Brood size of desiccated dauer  
939 larvae exposed to freezing remain like that non- desiccated dauer larvae. Average brood size is  
940 the mean of seven dauer larvae per each condition. Statistical comparison was performed by  
941 using non-parametric Kolmogorov-smirnov test n.s  $p > 0.05$ .

942

943

944

945

946

947

948

949

950

951

952

953 **Figure S1. Calibration of a radiocarbon ( $^{14}\text{C}$ ) date.**

954 Radiocarbon date ( $44,315 \pm 405$  BP) and calibrated age (45,839 -- 47,769 cal BP) of plant  
955 material collected from buried borrow P-1320. Radiocarbon ages were converted to calendar  
956 age equivalents with the OxCal V.4.4 program using the IntCal20 calibration curve. Pink-  
957 shaded area — radiocarbon date with standard deviation; grey-shaded area — radiocarbon date  
958 projection on the calibration curve with 95.4% probability.

959

960

961

962

963

964

965

966

967

968

969

970

971

972

973

974

975

976

977

978

979

980

981

982

983

984

985



986 **Figure S2. Morphology of *Panagrolaimus n. sp. n.*, female.**

987 Graphic presentations of holotype (a,b) and SEM pictures (c-i): a) anterior body, b) female  
988 reproductive branch, c–e) anterior end of three different female specimens, f) anterior part of the  
989 lateral ridge, g) vulva, h) ventral excretory/secretory pore, i) posterior body with anus and  
990 lateral ridge. Scale bars: a,b - 50  $\mu\text{m}$ , c,i - 3  $\mu\text{m}$ , d - 2  $\mu\text{m}$ , e - 1  $\mu\text{m}$ , f,h - 5  $\mu\text{m}$ , g - 10  $\mu\text{m}$ , .

991

992

993

994

995

996

997

998

999

1000

1001

1002

1003

1004

1005

1006

1007

1008

1009

1010

1011

1012

1013

1014

1015

1016

1017

1018 **Figure S3. Phylogenies inferred for genes sets using both concatenation and coalescence**  
1019 **approaches.**

1020 a) The ploidy level was analysed with *Smudgeplot* v0.2.1<sup>73</sup>. KMC version 3.1.0<sup>74</sup> was used  
1021 to count the 21-mers in the PacBio CCS reads. Then we ran *smudgeplot.py* to determine the  
1022 lower and upper coverage cut-offs. These were determined to be 14 and 380. 21-mers with a  
1023 coverage between 14 and 380 were filtered with *kmc\_tools*. Then, we computed the k-mer  
1024 pairs from the filtered 21-mers by running *smudgeplot.py hetkmers*. Finally, the produced a  
1025 smudgeplot shows an estimated ploidy of 3. b) Species tree inferred for 12,295 gene trees using  
1026 coalescence approach. The species tree implemented using the coalescence approach with  
1027 orthogroup gene tree is displayed. Novel species in this study are displayed in red. All nodes  
1028 have a posterior probability of 1. c) Species tree inferred for 102 taxa. The maximum likelihood  
1029 tree inferred using a concatenated supermatrix of 60 genes is displayed. Bootstrap values are  
1030 only displayed for nodes with less than 100% support. The platyhelminth *Macrostum lignano*  
1031 serves as an outgroup for rooting. The ancestral *Panagrolaimus*, sister to all others within the  
1032 *Panagrolaimus* genus, is highlighted in red.

1033

1034

1035

1036

1037

1038

1039

1040

1041

1042

1043

1044

1045

1046

1047

1048

1049

1050 **Figure S4. Combination of cryptobiotic states enhances survival of *C. elegans* dauer**  
1051 **larvae.**

1052 a) Desiccated dauer larvae manifest enhanced survival rate to heat stress (34°C). Error bars  
1053 indicate standard deviation of two independent experiments with two technical replicates. b)  
1054 Desiccated dauer larvae display enhanced survival rate to anoxia. Error bars indicate standard  
1055 deviation of two independent experiments with two technical replicates. Statistical  
1056 comparison was performed by paired two tailed t-test. \*p<0.05. c) *Panagrolaimus n. sp.*  
1057 possesses gene orthologs to most genes implicated in dauer formation and metabolism in *C.*  
1058 *elegans*. Black filled circles: Ortholog presence suggested by orthogroup clustering,  
1059 phylogenetic analysis, and domain architecture. White filled circles: No ortholog found via  
1060 current analysis (in all cases these *C. elegans* genes did not cluster with any *Panagrolaimus*  
1061 genes in the orthogroup clustering). Label: *C. elegans* enzyme names and orthogroup that  
1062 contains that gene according to our orthogroup clustering.

1063

1064

1065

1066

1067

1068

1069

1070

1071

1072

1073

1074

1075

1076

1077

1078

1079

1080

1081

1082

1083

1084 **Figure S5. *Panagrolaimus n. sp.* reduces triacylglycerols (TAGs) levels and accumulates**  
1085 **trehalose-6-phosphate upon preconditioning at 98%RH.**

1086 a) 1D-Thin layer chromatography of acetate labelled organic fractions of non-preconditioned  
1087 (1) and preconditioned (2) *P. kolymaensis*. b) Mass spectrometric quantification of TAG levels  
1088 of non-preconditioned (1) and preconditioned (2) *P. kolymaensis*. Error bars indicate standard  
1089 deviation of two biological replicates with two technical replicates. Statistical analysis was  
1090 performed using unpaired t-test with Welch correction \*\* $p < 0.001$ . c-d) non-preconditioned  
1091 and preconditioned mass spectrum of an empty region, e-f) spot 1 (trehalose), g-h) spot 7  
1092 (trehalose-6-phosphate) scraped out and extracted from the 2D-TLC.

1093

1094

1095

1096

1097

1098

1099

1100

1101

1102

1103

1104

1105

1106

1107

1108

1109

1110

1111

1112

1113

1114

1115

1116

1117 **Figure S6. Exploring a possible allopolyploid origin for extra proteins.**

1118 Gene-tree reconciliation was used to determine whether extra sets of proteins across  
1119 orthogroups originate through auto- or allopolyploidy. Different copies of proteins (designated  
1120 by ‘+’ and ‘\*’) suggest an allopolyploid origin. Parthenogenetic species are highlighted in bold.

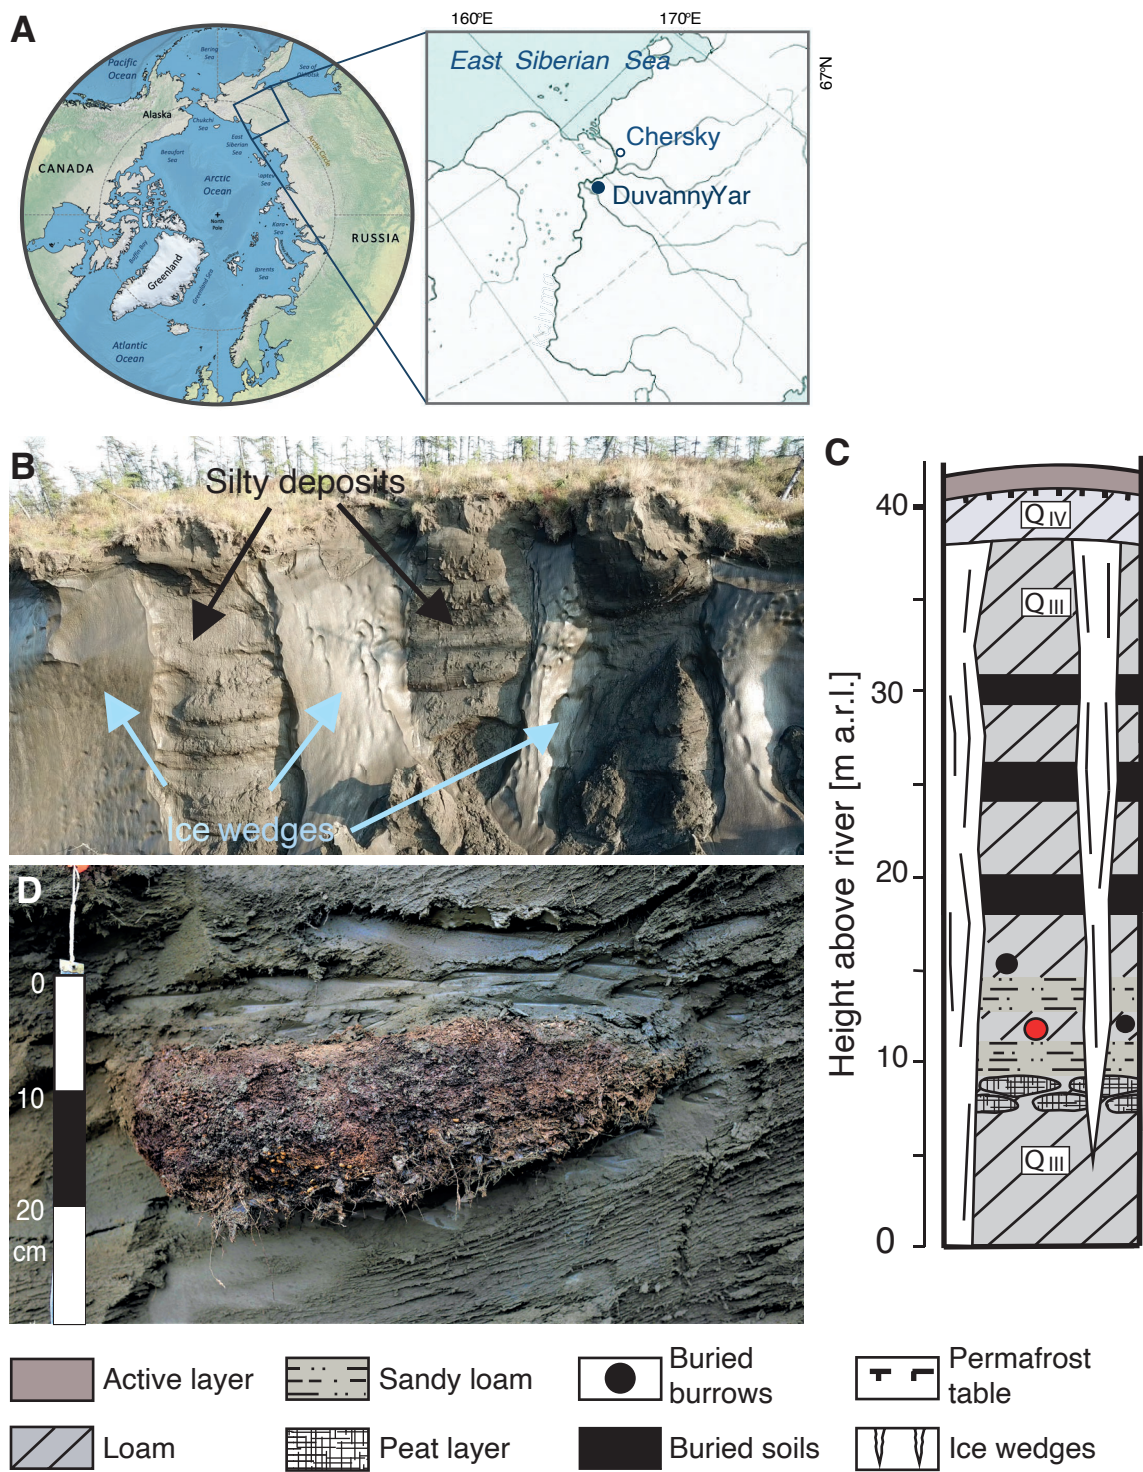

Figure 1  
Shatilovich *et al*

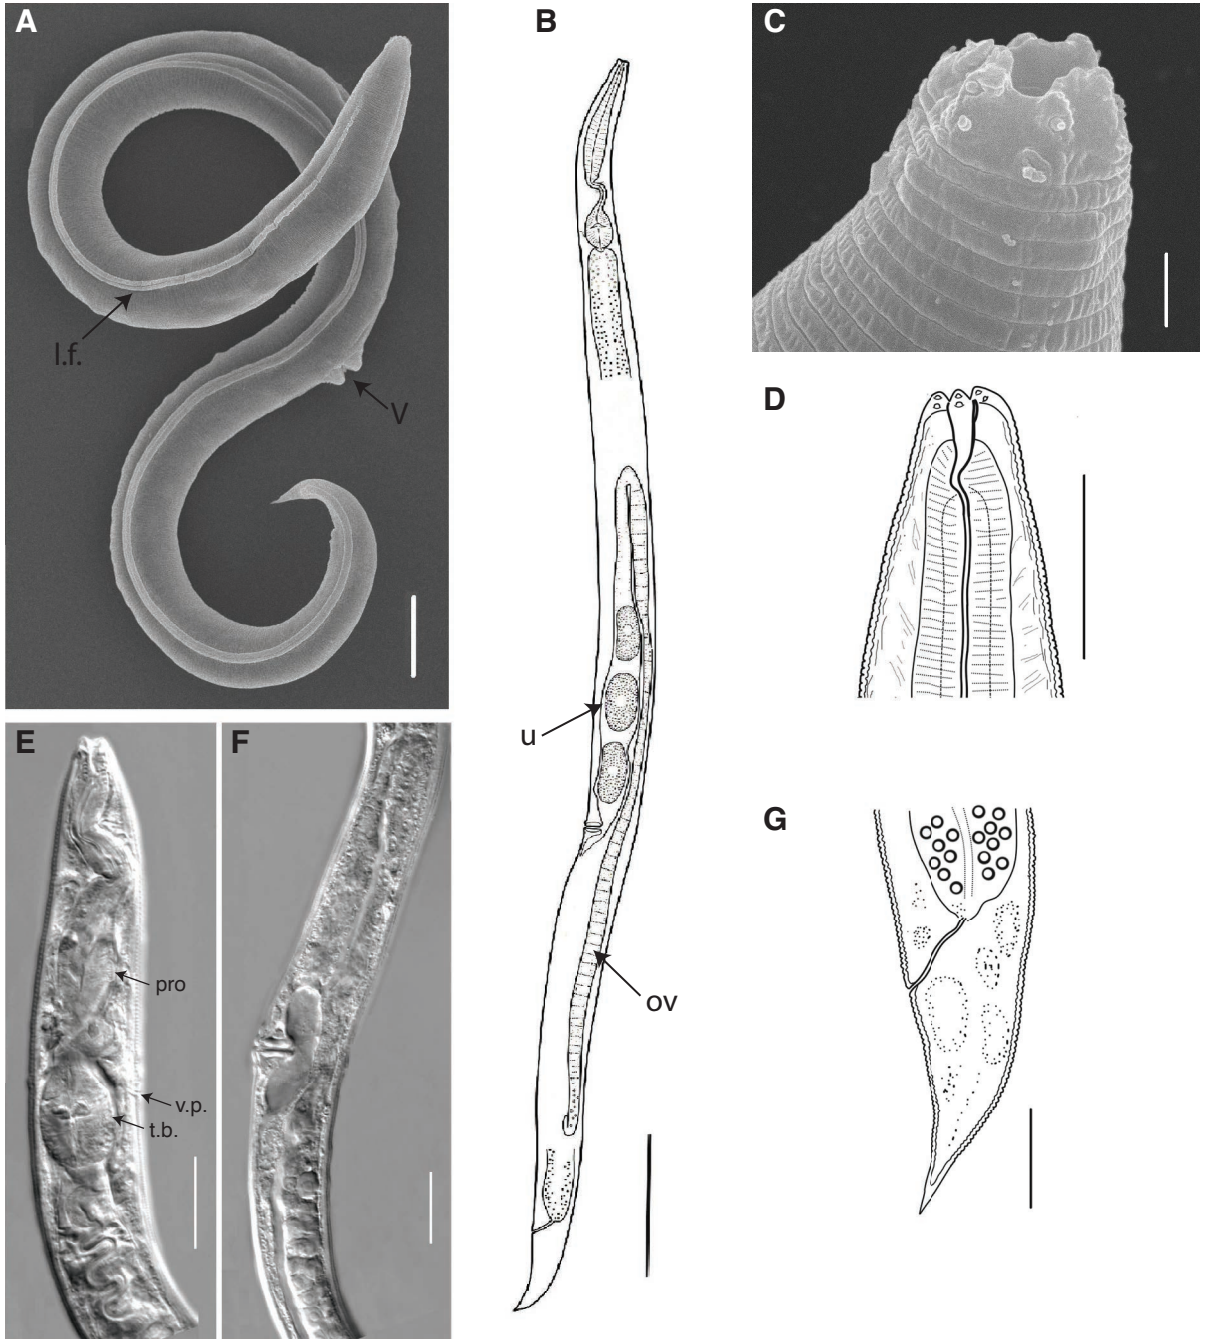

Figure 2  
Shatilovich *et al*





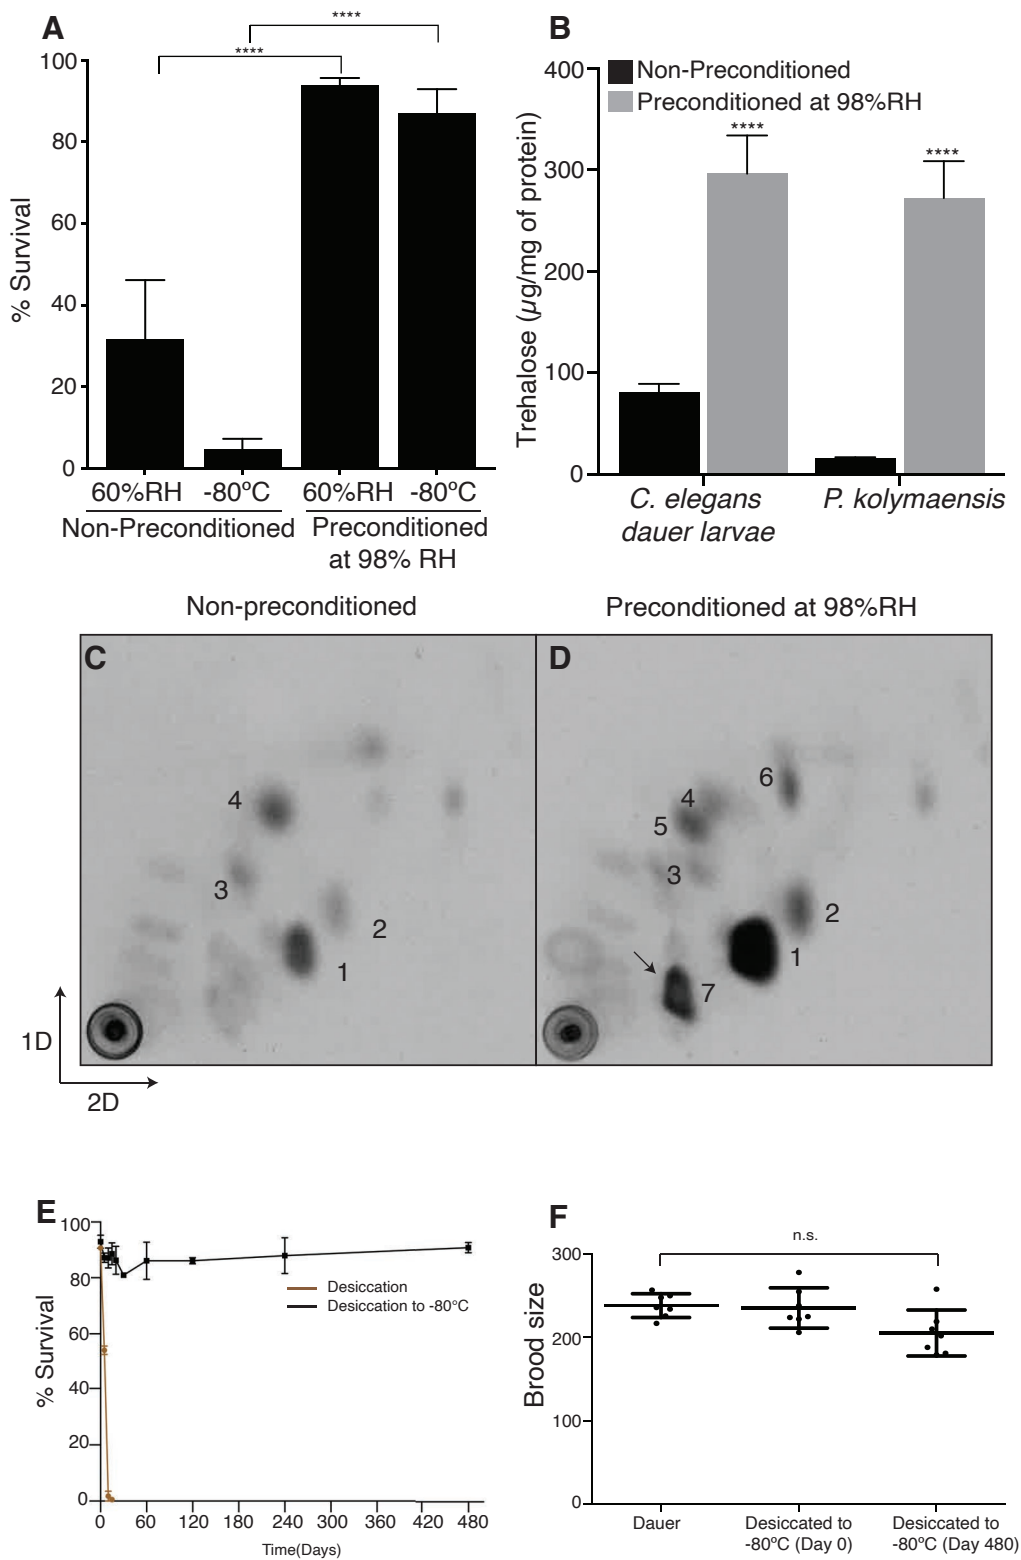

Figure 4  
Shatilovich *et al*

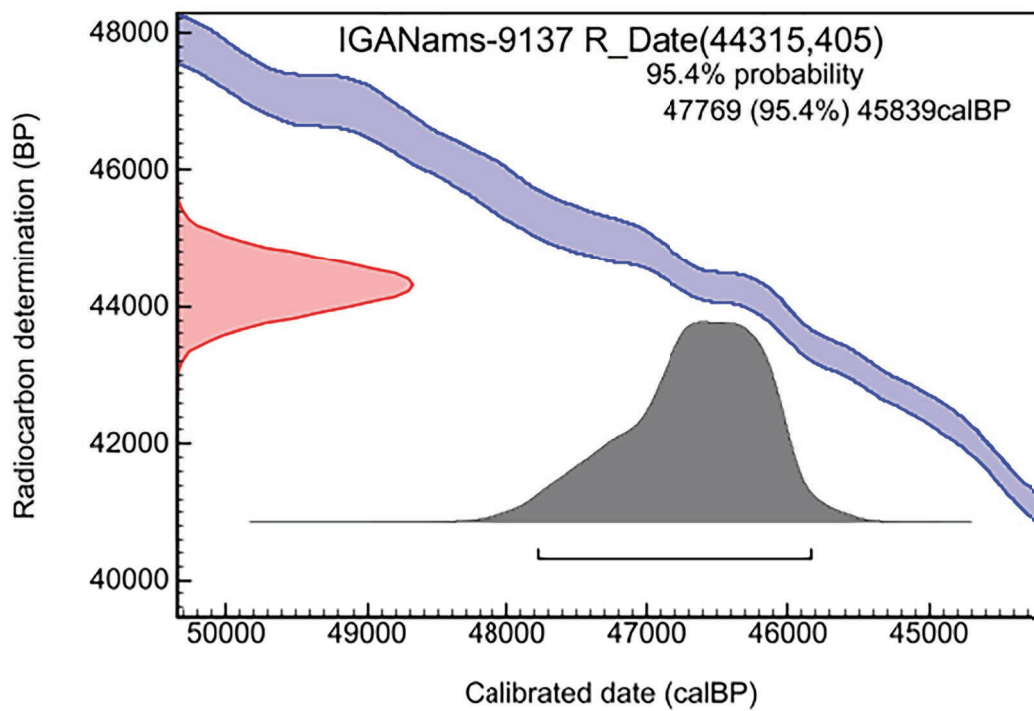

Figure S1  
Shatilovich *et al*

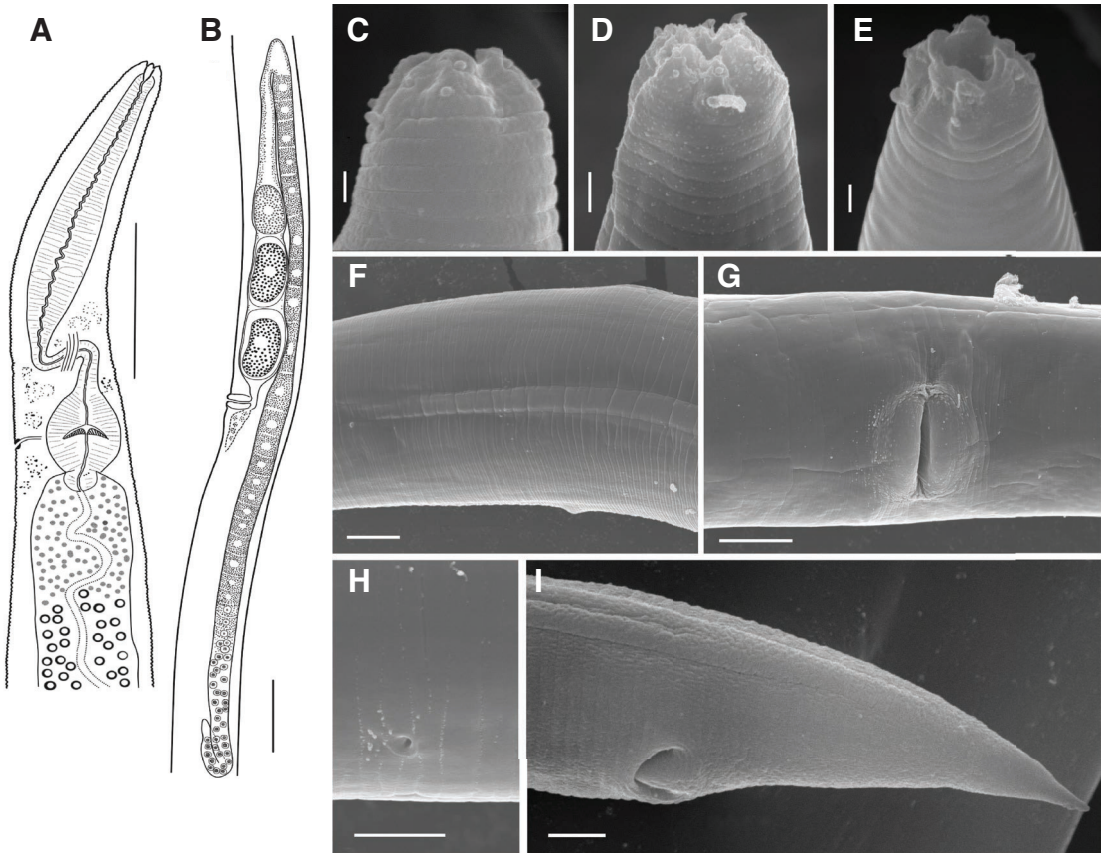

Figure S2  
Shatilovich *et al*

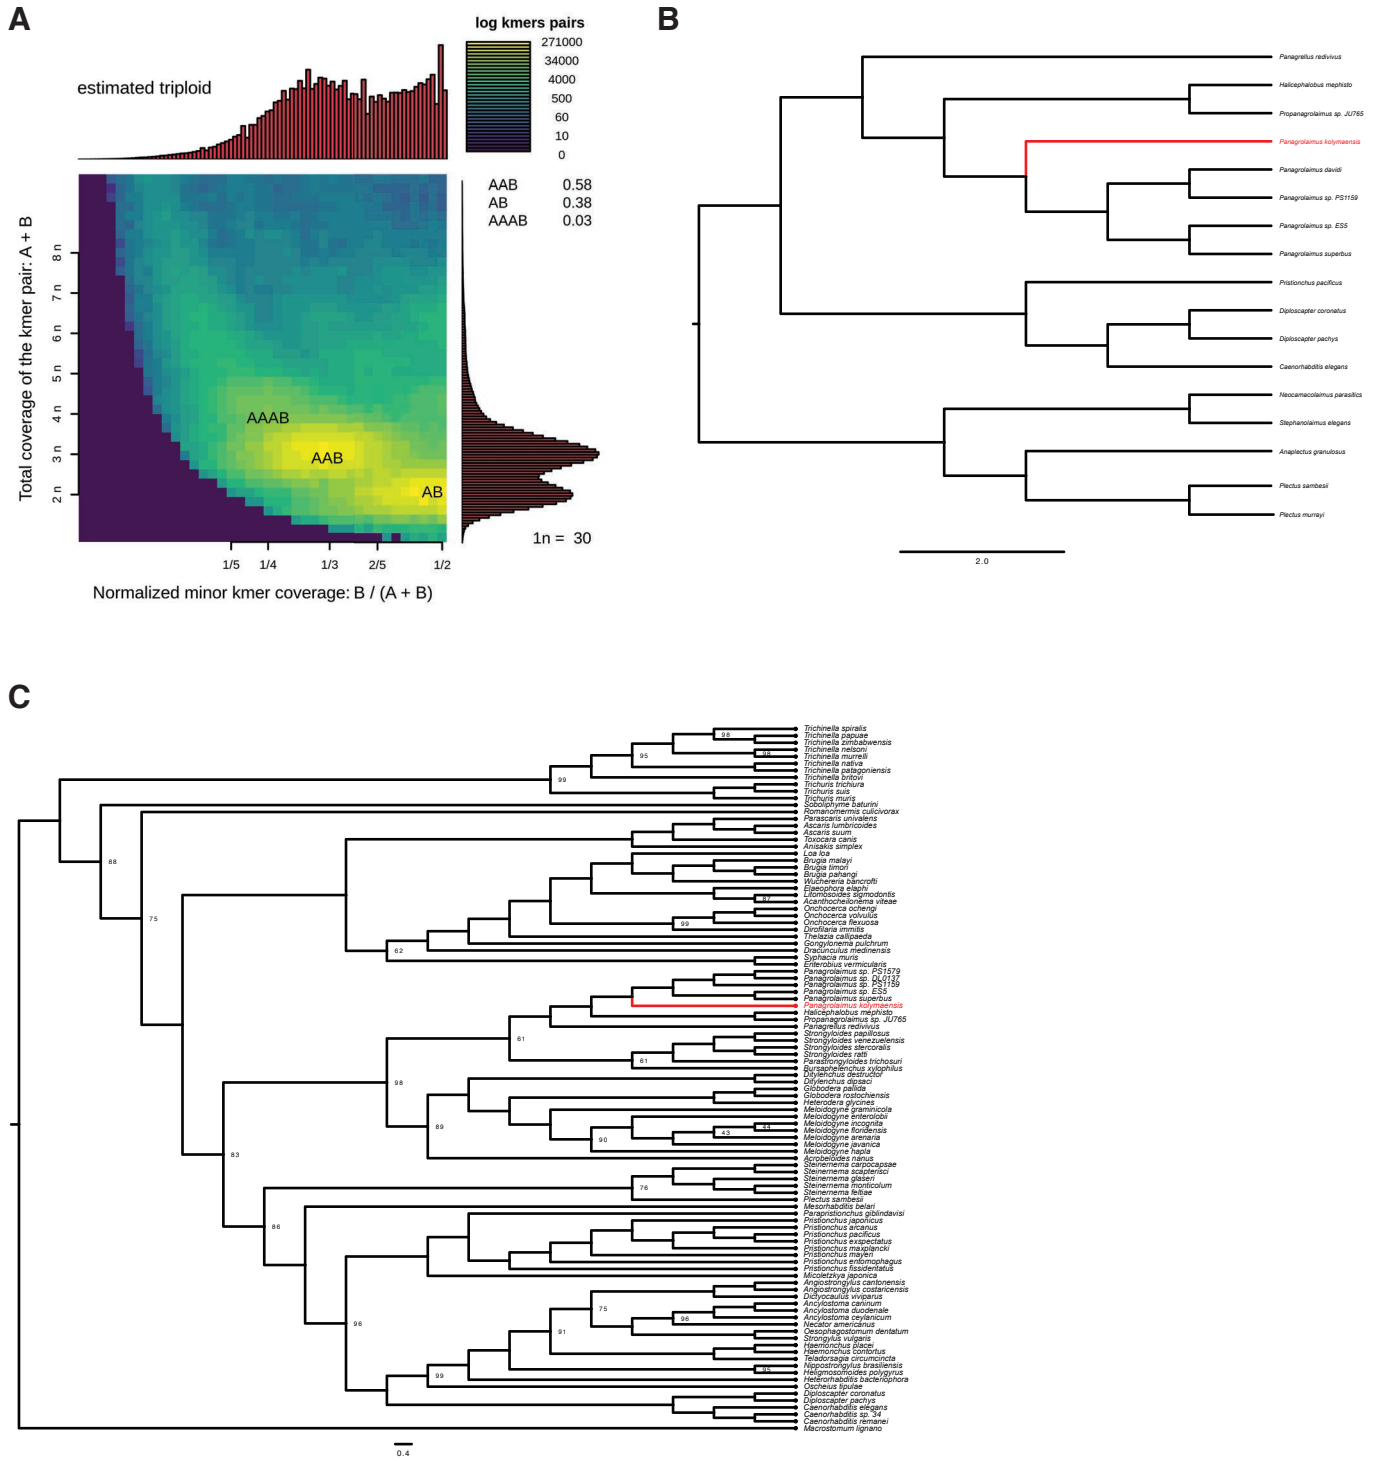

Figure S3  
Shatilovich *et al*

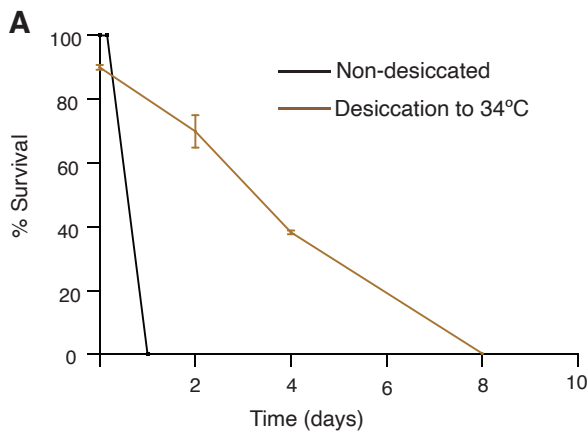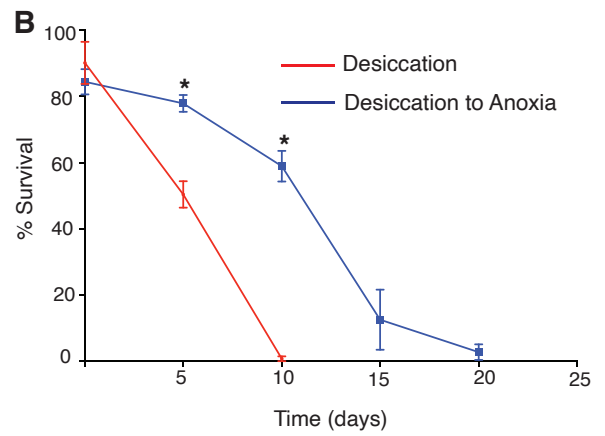

**C**

DAF genes

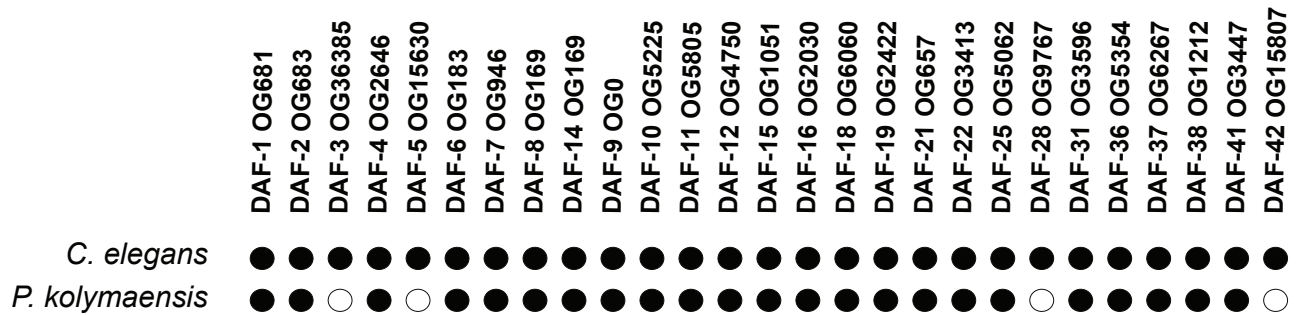

Figure S4  
Shatilovich *et al*

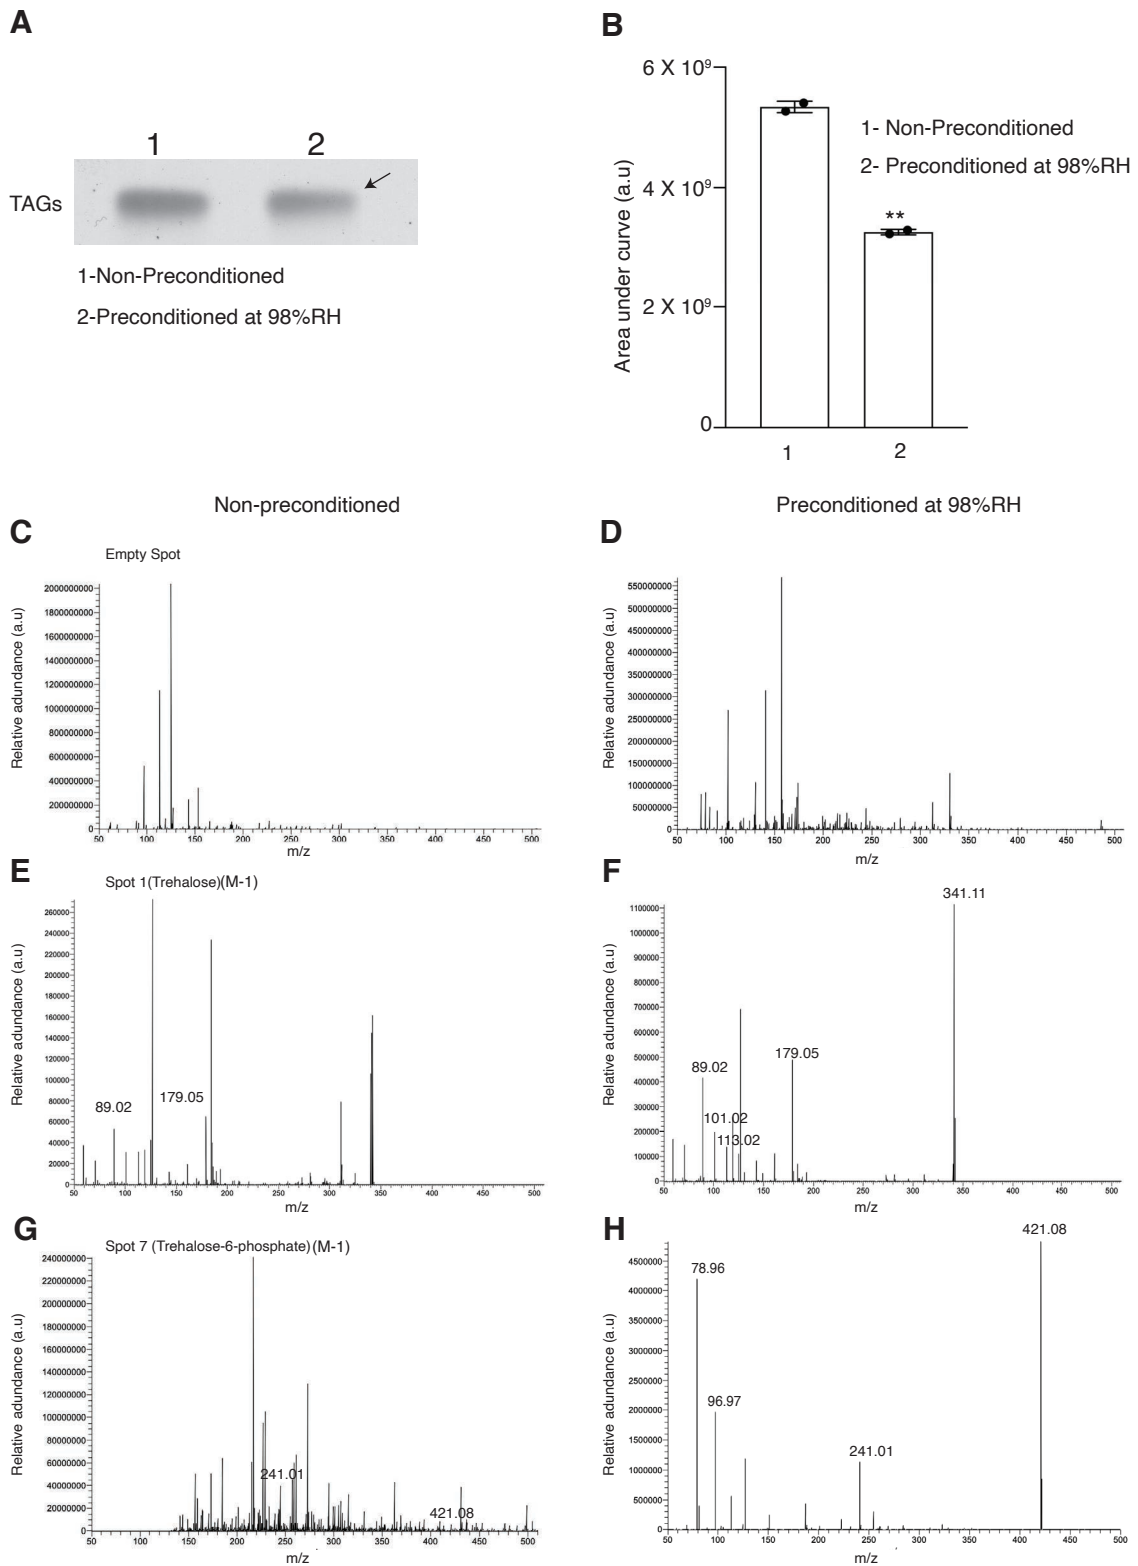

Figure S5  
Shatilovich *et al*

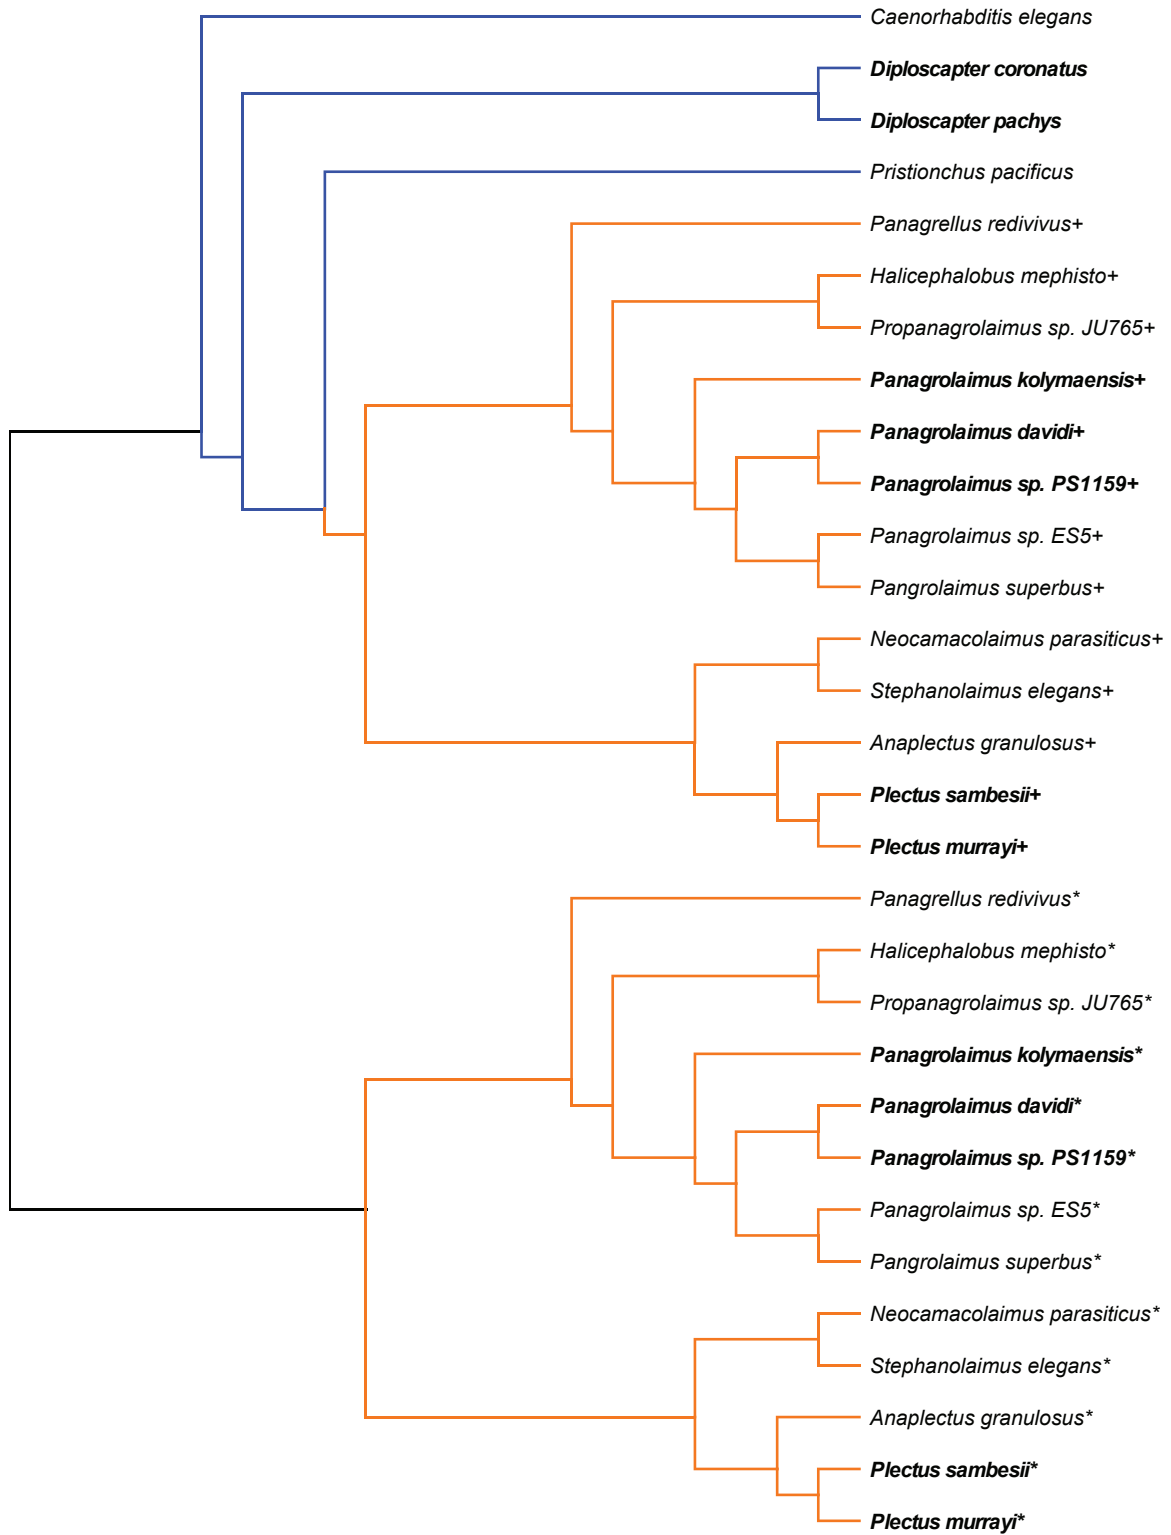

Figure S6  
 Shatilovich *et al*
